# Supplementary material
Source: publisher figshare collection journal article supplement (https://frontiersin.figshare.com/ndownloader/files/36566070)
Supplement: Supplementary file [file 36566070]

|             |                                          | Liver_1  | Liver_2  | Liver_3  | Liver_4  | Liver_6  | Liver_8  | Liver_9  | Liver_10 | Liver_11 | Liver_12 | Liver_13 | Liver_14 | Liver_16 | Liver_17 |
|-------------|------------------------------------------|----------|----------|----------|----------|----------|----------|----------|----------|----------|----------|----------|----------|----------|----------|
| Compound ID | Metabolite                               | Control  | Control  | Control  | Control  | Control  | Control  | Control  | Nitrate  | Nitrate  | Nitrate  | Nitrate  | Nitrate  | Nitrate  | Nitrate  |
| CPD01       | Lactate                                  | 908000   | 441000   | 770000   | 823000   | 678000   | 1330000  | 689000   | 781000   | 647000   | 781000   | 913000   | 888000   | 691000   | 538000   |
| CPD02       | 12-hydroxydodecanoic acid                | 41983    | 50301    | 72721    | 63565    | 33071    | 42449    | 60731    | 135000   | 52222    | 69387    | 33290    | 126000   | 39870    | 48585    |
| CPD03       | 2-acetamido-2-deoxy-beta-d-glucosylamine | 22805    | 51445    | 86597    | 39420    | 39284    | 71289    | 42821    | 202000   | 80399    | 83582    | 50103    | 186000   | 79717    | 114000   |
| CPD04       | 2-amino-2-methyl-propanoate              | 228000   | 314000   | 104000   | 344000   | 161000   | 215000   | 301000   | 568000   | 138000   | 555000   | 421000   | 215000   | 123000   | 379000   |
| CPD05       | 2-aminoethyl dihydrogen phosphate        | 3896.4   | 9397.5   | 6975.9   | 8247.6   | 4860.9   | 6868.3   | 9169.2   | 11498    | 10014    | 6030.6   | 6547.7   | 12667    | 4293.2   | 6896.2   |
| CPD06       | 2-hydroxybutyric acid                    | 63916    | 27263    | 28848    | 47621    | 30627    | 28626    | 27524    | 32099    | 29702    | 46227    | 66708    | 76966    | 58290    | 30212    |
| CPD07       | DMP                                      | 52568    | 45335    | 39821    | 59318    | 33160    | 129000   | 46750    | 79763    | 115000   | 151000   | 94541    | 132000   | 126000   | 55126    |
| CPD08       | 4-aminobutanoic acid                     | 228000   | 314000   | 104000   | 344000   | 161000   | 215000   | 301000   | 568000   | 138000   | 555000   | 421000   | 215000   | 123000   | 379000   |
| CPD09       | 4-hydroxyproline                         | 297000   | 602000   | 304000   | 300000   | 275000   | 775000   | 328000   | 781000   | 477000   | 969000   | 588000   | 620000   | 327000   | 413000   |
| CPD10       | 5-aminolevulinic acid                    | 297000   | 602000   | 304000   | 300000   | 275000   | 775000   | 328000   | 781000   | 477000   | 969000   | 588000   | 620000   | 327000   | 413000   |
| CPD11       | 5-aminopentanoate                        | 33400000 | 33100000 | 16200000 | 19500000 | 14000000 | 28700000 | 27700000 | 49900000 | 41600000 | 53300000 | 44600000 | 32100000 | 20800000 | 32600000 |
| CPD12       | 5-oxoproline                             | 57461    | 13663    | 63268    | 32872    | 59229    | 9130.3   | 18152    | 1534.1   | 19505    | 45817    | 39277    | 36470    | 26465    | 17919    |
| CPD13       | 5'-methylthioadenosine                   | 811000   | 997000   | 599000   | 106000   | 26369    | 269000   | 99221    | 291000   | 2220000  | 1550000  | 481000   | 793000   | 598000   | 60902    |
| CPD14       | A-D-galactose-1-phosphate                | 628000   | 388000   | 916000   | 706000   | 569000   | 216000   | 418000   | 633000   | 267000   | 393000   | 528000   | 495000   | 310000   | 650000   |
| CPD15       | Adenine                                  | 73196    | 32138    | 35312    | 21875    | 15966    | 17452    | 12749    | 14354    | 20832    | 33305    | 52945    | 117000   | 78532    | 15111    |
| CPD16       | Adenosine                                | 640000   | 415000   | 138000   | 267000   | 154000   | 195000   | 182000   | 676000   | 524000   | 545000   | 479000   | 424000   | 440000   | 373000   |
| CPD17       | ADP                                      | 339000   | 396000   | 447000   | 100000   | 24966    | 84734    | 127000   | 533000   | 432000   | 527000   | 114000   | 118000   | 124000   | 117000   |
| CPD18       | ADP-ribose                               | 72152    | 41988    | 36681    | 53025    | 17118    | 12281    | 28755    | 25536    | 36036    | 46991    | 41738    | 14616    | 20863    | 24939    |
| CPD19       | AMP                                      | 2960000  | 4860000  | 2720000  | 2570000  | 730000   | 3290000  | 3690000  | 5930000  | 5860000  | 6860000  | 2070000  | 7370000  | 3140000  | 3730000  |
| CPD20       | ADP-glucose                              | 113000   | 355000   | 432000   | 51097    | 3024     | 83092    | 116000   | 519000   | 302000   | 527000   | 41460    | 116000   | 64032    | 40758    |
| CPD21       | Alanine                                  | 419000   | 396000   | 384000   | 432000   | 274000   | 630000   | 475000   | 944000   | 745000   | 1370000  | 605000   | 1570000  | 956000   | 498000   |
| CPD22       | Allothreonine                            | 508000   | 782000   | 450000   | 260000   | 179000   | 409000   | 676000   | 975000   | 1080000  | 1500000  | 537000   | 1940000  | 1170000  | 786000   |
| CPD23       | Glucose-1-phosphate                      | 64216    | 331000   | 204000   | 160000   | 97807    | 286000   | 239000   | 380000   | 210000   | 206000   | 205000   | 501000   | 123000   | 243000   |
| CPD24       | Aminoadipate                             | 215000   | 79646    | 104000   | 103000   | 55502    | 84467    | 45459    | 313000   | 255000   | 307000   | 268000   | 276000   | 139000   | 104000   |
| CPD25       | Arginine                                 | 1340000  | 685000   | 738000   | 1190000  | 984000   | 832000   | 1890000  | 2680000  | 2370000  | 3000000  | 1580000  | 6460000  | 5030000  | 1650000  |
| CPD26       | Ascorbate                                | 1642     | 11855    | 11845    | 2765.8   | 23877    | 97083    | 4000.6   | 23342    | 6637.7   | 7313.1   | 59779    | 8465.7   | 3977.1   | 20873    |
| CPD27       | Asparagine                               | 135000   | 83119    | 89662    | 112000   | 66552    | 58651    | 67732    | 378000   | 149000   | 130000   | 127000   | 165000   | 108000   | 81717    |
| CPD28       | Aspartate                                | 355000   | 265000   | 217000   | 254000   | 161000   | 179000   | 195000   | 939000   | 411000   | 644000   | 263000   | 659000   | 488000   | 287000   |
| CPD29       | Azelaic acid                             | 64786    | 72963    | 79920    | 50797    | 95580    | 18290    | 42679    | 24717    | 24562    | 36018    | 55862    | 41087    | 27759    | 45947    |
| CPD30       | Beta-alanine                             | 419000   | 396000   | 384000   | 432000   | 274000   | 630000   | 475000   | 944000   | 745000   | 1370000  | 605000   | 1570000  | 956000   | 498000   |
| CPD31       | NADP                                     | 19935    | 55225    | 61978    | 17262    | 10998    | 6206.6   | 5273.1   | 72713    | 30744    | 54635    | 5028.6   | 7511     | 5790.7   | 6002.9   |
| CPD32       | Betaine                                  | 33400000 | 33100000 | 16200000 | 19500000 | 14000000 | 28700000 | 27700000 | 49900000 | 41600000 | 53300000 | 44600000 | 32100000 | 20800000 | 32600000 |
| CPD33       | Caprylic acid                            | 15451    | 24650    | 48439    | 1979.7   | 11007    | 14891    | 14199    | 291.9    | 13584    | 29019    | 2135.2   | 19175    | 2821.1   | 14914    |
| CPD34       | Carnitine                                | 706000   | 1200000  | 288000   | 762000   | 466000   | 738000   | 1820000  | 1420000  | 944000   | 1340000  | 1040000  | 1180000  | 1530000  | 500000   |
| CPD35       | 4-hydroxyproline                         | 297000   | 602000   | 304000   | 300000   | 275000   | 775000   | 328000   | 781000   | 477000   | 969000   | 588000   | 620000   | 327000   | 413000   |
| CPD36       | Citrate                                  | 82534    | 404000   | 103000   | 26236    | 26577    | 146000   | 52196    | 109000   | 106000   | 88122    | 43663    | 45495    | 146000   | 29266    |
| CPD37       | Citrulline                               | 204000   | 471000   | 325000   | 344000   | 189000   | 371000   | 566000   | 394000   | 576000   | 896000   | 386000   | 707000   | 352000   | 617000   |
| CPD38       | CMP                                      | 16086    | 107000   | 67041    | 44645    | 17914    | 47206    | 46861    | 55771    | 97191    | 96571    | 43636    | 70707    | 40169    | 53182    |
| CPD39       | Creatine                                 | 14500000 | 12200000 | 8840000  | 14600000 | 9260000  | 15900000 | 18800000 | 23400000 | 17100000 | 17500000 | 25400000 | 22300000 | 14900000 | 22100000 |
| CPD40       | Creatine phosphate dibasic tetrahydrate  | 116000   | 279000   | 264000   | 141000   | 46002    | 82844    | 131000   | 349000   | 276000   | 202000   | 223000   | 148000   | 113000   | 220000   |
| CPD41       | Crystathionine                           | 887000   | 3580000  | 1720000  | 176000   | 134000   | 257000   | 184000   | 1810000  | 1060000  | 3150000  | 733000   | 4350000  | 2250000  | 229000   |
| CPD42       | Cytidine                                 | 72906    | 21050    | 24645    | 104000   | 155000   | 194000   | 153000   | 53918    | 38035    | 92340    | 52224    | 44962    | 62060    | 83356    |
| CPD43       | Cytidine 5'-diphosphocholine             | 134000   | 314000   | 194000   | 348000   | 123000   | 437000   | 514000   | 392000   | 401000   | 600000   | 380000   | 616000   | 319000   | 444000   |
| CPD44       | 3-phosphoglyceric acid                   | 4630.1   | 31138    | 37692    | 9511.6   | 6653.7   | 9751.8   | 7699.9   | 32151    | 41311    | 35431    | 8833.2   | 10289    | 10191    | 14768    |
| CPD45       | Galactosamine                            | 34914    | 45811    | 57344    | 58256    | 37170    | 85832    | 59595    | 117000   | 35553    | 72477    | 56197    | 125000   | 35663    | 66599    |
| CPD46       | Fructose-6-phosphate                     | 404000   | 417000   | 908000   | 705000   | 367000   | 218000   | 419000   | 631000   | 275000   | 392000   | 361000   | 372000   | 183000   | 649000   |
| CPD47       | Gluconolactone                           | 8752.2   | 22275    | 4363.7   | 7106.8   | 9684     | 41715    | 14280    | 8397.9   | 25435    | 10209    | 11553    | 7476.2   | 8479.6   | 7301.8   |
| CPD48       | Mannosamine                              | 34914    | 45811    | 57344    | 58256    | 37170    | 85832    | 59595    | 117000   | 35553    | 72477    | 56197    | 125000   | 35663    | 66599    |
| CPD49       | Ornithine                                | 26983    | 14381    | 45662    | 12055    | 16652    | 15133    | 17754    | 36318    | 42359    | 104000   | 24359    | 94571    | 62603    | 15856    |
| CPD50       | Pantothenic acid                         | 111000   | 269000   | 84725    | 167000   | 71591    | 193000   | 199000   | 165000   | 186000   | 254000   | 259000   | 288000   | 212000   | 316000   |
| CPD51       | Ribose-5-phosphate                       | 66874    | 55000    | 65941    | 71163    | 63999    | 35629    | 86346    | 63798    | 99725    | 34673    | 54169    | 67872    | 48407    | 77199    |
| CPD52       | Deoxycarnitine                           | 253000   | 860000   | 336000   | 576000   | 178000   | 609000   | 941000   | 1070000  | 844000   | 1250000  | 695000   | 1300000  | 935000   | 1170000  |
| CPD53       | Dopamine                                 | 42154    | 32892    | 26026    | 28766    | 14402    | 23480    | 29419    | 86860    | 92996    | 112000   | 36500    | 139000   | 135000   | 17156    |
| CPD54       | Elaidic acid                             | 133000   | 128000   | 104000   | 184000   | 482000   | 388000   | 160000   | 97167    | 338000   | 277000   | 144000   | 58916    | 239000   | 286000   |
| CPD55       | Erucic acid                              | 12569    | 4077.5   | 4623.1   | 8168.6   | 24921    | 6023     | 2738.6   | 13062    | 11584    | 31703    | 3666.6   | 1641.4   | 4718.3   | 11835    |
| CPD56       | Ethanolamine phosphate                   | 23846    | 47982    | 21379    | 52814    | 23716    | 41109    | 50757    | 97462    | 72529    | 85168    | 53303    | 94891    | 52604    | 62564    |
| CPD57       | Ethyl-3-ureidopropionate                 | 43284    | 99523    | 169000   | 66533    | 78591    | 108000   | 76915    | 434000   | 138000   | 149000   | 59942    | 252000   | 123000   | 171000   |
| CPD58       | Ethylmalonic acid                        | 7563.2   | 3810     | 0        | 9219.3   | 8943.3   | 0        | 0        | 2658.6   | 0        | 6765.9   | 11302    | 0        | 7777.8   | 8459.4   |
| CPD59       | Flavin adenine dinucleotide              | 33849    | 239000   | 88698    | 22602    | 19953    | 10890    | 30019    | 50348    | 151000   | 88977    | 27329    | 8082.9   | 26964    | 24024    |
| CPD60       | Fumarate                                 | 137000   | 86613    | 53094    | 64069    | 60066    | 94072    | 82539    | 80451    | 129000   | 95247    | 79900    | 131000   | 124000   | 60424    |
| CPD61       | Galactarate                              | 38767    | 57200    | 12037    | 14639    | 11853    | 41087    | 108000   | 8477.7   | 20110    | 19956    | 32694    | 53766    | 40559    | 13780    |
| CPD62       | Gluconic acid                            | 213000   | 208000   | 112000   | 159000   | 173000   | 246000   | 167000   | 159000   | 307000   | 259000   | 171000   | 205000   | 233000   | 185000   |
| CPD63       | Glucosamine                              | 34914    | 45811    | 57344    | 58256    | 37170    | 85832    | 59595    | 117000   | 35553    | 72477    | 56197    | 125000   | 35663    | 66599    |

|        |                                 |          |          |          |          |          |          |          |          |          |          |          |          |          |          |
|--------|---------------------------------|----------|----------|----------|----------|----------|----------|----------|----------|----------|----------|----------|----------|----------|----------|
| CPD64  | Glucose                         | 459000   | 522000   | 621000   | 557000   | 455000   | 1260000  | 754000   | 517000   | 666000   | 376000   | 464000   | 578000   | 257000   | 380000   |
| CPD65  | Glucuronic acid                 | 47450    | 59013    | 30457    | 61833    | 55503    | 34631    | 40873    | 45770    | 65486    | 51089    | 44465    | 44880    | 21240    | 66997    |
| CPD66  | Glutamic acid                   | 2990000  | 3360000  | 2820000  | 4400000  | 1770000  | 3650000  | 1680000  | 8590000  | 4620000  | 5960000  | 3990000  | 5090000  | 2480000  | 2910000  |
| CPD67  | Glutamine                       | 85724    | 137000   | 100000   | 67711    | 56844    | 78117    | 106000   | 113000   | 197000   | 71136    | 58385    | 76131    | 39185    | 58822    |
| CPD68  | Glutarate                       | 1172.2   | 2651.3   | 2114.7   | 9132.4   | 9081     | 581.85   | 966.33   | 1529.9   | 295.85   | 6589.2   | 11648    | 442.19   | 8027.2   | 6825.5   |
| CPD69  | Glutathione                     | 772000   | 3340000  | 1100000  | 2240000  | 1370000  | 9930000  | 9660000  | 1090000  | 2430000  | 1240000  | 14500000 | 14800000 | 13200000 | 15400000 |
| CPD70  | Glycerol 2-phosphate            | 432000   | 291000   | 557000   | 441000   | 499000   | 477000   | 568000   | 514000   | 702000   | 551000   | 426000   | 610000   | 278000   | 377000   |
| CPD71  | Glycine                         | 20709    | 25278    | 12966    | 32603    | 19770    | 46653    | 43266    | 49794    | 38052    | 72858    | 27941    | 61388    | 43502    | 46481    |
| CPD72  | Guanine                         | 119000   | 208000   | 21766    | 306000   | 62976    | 83779    | 77739    | 525000   | 78803    | 92753    | 179000   | 45630    | 77085    | 225000   |
| CPD73  | Guanosine                       | 88044    | 48213    | 22770    | 119000   | 67338    | 2709.6   | 16565    | 80630    | 13183    | 15362    | 108000   | 13189    | 26100    | 78541    |
| CPD74  | GMP                             | 196000   | 210000   | 187000   | 136000   | 70177    | 180000   | 254000   | 505000   | 289000   | 543000   | 220000   | 392000   | 279000   | 212000   |
| CPD75  | Glucose-6-phosphate             | 124000   | 331000   | 204000   | 160000   | 97807    | 286000   | 239000   | 380000   | 210000   | 447000   | 205000   | 501000   | 123000   | 243000   |
| CPD76  | Hippurate                       | 2580000  | 2300000  | 1140000  | 2150000  | 1170000  | 4260000  | 2850000  | 2390000  | 3730000  | 8000000  | 4520000  | 3490000  | 5290000  | 3580000  |
| CPD77  | Histidine                       | 2690000  | 880000   | 1940000  | 1310000  | 1680000  | 1210000  | 1160000  | 4230000  | 3200000  | 3400000  | 3720000  | 4330000  | 2170000  | 1540000  |
| CPD78  | Homoserine                      | 508000   | 782000   | 450000   | 260000   | 179000   | 409000   | 676000   | 975000   | 1080000  | 1500000  | 537000   | 1940000  | 1170000  | 786000   |
| CPD79  | Hydroxyisobutyric acid          | 63916    | 27263    | 28848    | 47621    | 30627    | 28626    | 27524    | 17399    | 29702    | 46227    | 66708    | 76966    | 58290    | 30212    |
| CPD80  | Hypotaurine                     | 12012    | 46711    | 24622    | 13466    | 9395     | 42621    | 46394    | 31664    | 67529    | 41857    | 18933    | 46498    | 38904    | 32743    |
| CPD81  | Hypoxanthine                    | 1790000  | 1940000  | 707000   | 3150000  | 1890000  | 3000000  | 2490000  | 3540000  | 2790000  | 3790000  | 4280000  | 1480000  | 1960000  | 4020000  |
| CPD82  | Inosine                         | 1190000  | 397000   | 265000   | 1010000  | 1270000  | 306000   | 501000   | 456000   | 400000   | 343000   | 1080000  | 268000   | 530000   | 999000   |
| CPD83  | IMP                             | 438000   | 976000   | 486000   | 1050000  | 853000   | 973000   | 658000   | 2080000  | 398000   | 2190000  | 838000   | 940000   | 818000   | 1210000  |
| CPD84  | Inosine 5'-phosphate            | 451000   | 577000   | 548000   | 1230000  | 1760000  | 1230000  | 1120000  | 1150000  | 383000   | 1120000  | 1030000  | 592000   | 766000   | 1630000  |
| CPD85  | Isoleucine                      | 3830000  | 3430000  | 2060000  | 1870000  | 1120000  | 2490000  | 2080000  | 6490000  | 8770000  | 9570000  | 3630000  | 18000000 | 11200000 | 2130000  |
| CPD86  | Kynurenine                      | 76712    | 16001    | 10744    | 9614.4   | 12304    | 13609    | 14971    | 39652    | 92959    | 106000   | 36815    | 103000   | 12953    | 20185    |
| CPD87  | Aminocyclopropane-1-carboxylate | 183000   | 418000   | 343000   | 273000   | 128000   | 215000   | 220000   | 681000   | 302000   | 791000   | 217000   | 547000   | 234000   | 306000   |
| CPD88  | Oleoyl-rac-glycerol             | 150000   | 66069    | 38934    | 710000   | 417000   | 365000   | 110000   | 621000   | 169000   | 618000   | 423000   | 297000   | 172000   | 290000   |
| CPD89  | Lauric acid                     | 18792    | 39675    | 16080    | 14220    | 28404    | 41409    | 14928    | 9938.3   | 11058    | 10403    | 9622     | 12772    | 6646.8   | 13239    |
| CPD90  | Lauroylcarnitine A104           | 13856    | 4774.9   | 2981.8   | 32989    | 12561    | 17776    | 17242    | 20133    | 16656    | 37115    | 37560    | 25464    | 17228    | 41375    |
| CPD91  | Leucine                         | 3830000  | 3430000  | 2060000  | 1870000  | 1120000  | 2490000  | 2080000  | 6490000  | 8770000  | 9570000  | 3630000  | 18000000 | 11200000 | 2130000  |
| CPD92  | Lysine                          | 758000   | 334000   | 375000   | 596000   | 413000   | 476000   | 668000   | 1330000  | 1170000  | 1610000  | 1020000  | 2990000  | 1800000  | 667000   |
| CPD93  | Malate                          | 900000   | 519000   | 362000   | 434000   | 398000   | 635000   | 554000   | 560000   | 767000   | 626000   | 491000   | 943000   | 806000   | 386000   |
| CPD94  | Maleic acid                     | 132000   | 68563    | 52535    | 65120    | 62010    | 92285    | 80522    | 81585    | 86755    | 96330    | 80444    | 131000   | 125000   | 60393    |
| CPD95  | Menquinone                      | 2289.3   | 2091.3   | 2404.6   | 1293.2   | 2326.5   | 0        | 1863.8   | 340.2    | 0        | 2690.4   | 705.16   | 1191.3   | 996.44   | 1250.1   |
| CPD96  | Methylmalonate                  | 240000   | 81850    | 66527    | 99698    | 77553    | 38157    | 67433    | 85827    | 140000   | 90288    | 159000   | 283000   | 226000   | 70626    |
| CPD97  | Myristic acid                   | 25352    | 46163    | 47055    | 40361    | 45126    | 61534    | 35527    | 16023    | 44873    | 30826    | 35578    | 16634    | 16785    | 36618    |
| CPD98  | Acetylneuraminat                | 24111    | 20675    | 21200    | 40148    | 30195    | 25873    | 9614.7   | 27920    | 26863    | 22504    | 27214    | 16948    | 11240    | 20457    |
| CPD99  | Methyl-aspartic acid            | 279000   | 284000   | 276000   | 292000   | 201000   | 264000   | 148000   | 374000   | 389000   | 206000   | 116000   | 240000   | 102000   | 76981    |
| CPD100 | Methyl-glutarate                | 215000   | 79646    | 104000   | 103000   | 55502    | 84467    | 45459    | 313000   | 255000   | 307000   | 268000   | 276000   | 139000   | 104000   |
| CPD101 | Methyl-histidine                | 183000   | 255000   | 151000   | 260000   | 119000   | 261000   | 151000   | 481000   | 224000   | 434000   | 289000   | 321000   | 217000   | 272000   |
| CPD102 | NAD                             | 440000   | 685000   | 488000   | 516000   | 425000   | 413000   | 351000   | 620000   | 319000   | 470000   | 415000   | 298000   | 332000   | 554000   |
| CPD103 | NE,NE,NE-Trimethyllysine        | 506000   | 1040000  | 222000   | 970000   | 1220000  | 449000   | 527000   | 736000   | 881000   | 1440000  | 1450000  | 752000   | 1160000  | 890000   |
| CPD104 | Nicotinamide                    | 618000   | 769000   | 351000   | 1570000  | 661000   | 2160000  | 849000   | 755000   | 1260000  | 1800000  | 1410000  | 1040000  | 1080000  | 1390000  |
| CPD105 | Norvaline                       | 33400000 | 33100000 | 16200000 | 19500000 | 14000000 | 28700000 | 27700000 | 49900000 | 41600000 | 53300000 | 44600000 | 32100000 | 20800000 | 33100000 |
| CPD106 | Acetyl-serine                   | 279000   | 283000   | 272000   | 293000   | 200000   | 262000   | 148000   | 374000   | 386000   | 205000   | 205000   | 235000   | 72036    | 76981    |
| CPD107 | Phosphoserine                   | 10563    | 16573    | 12016    | 17846    | 4941.8   | 11672    | 7865.1   | 32468    | 17176    | 18210    | 12370    | 16690    | 10607    | 10646    |
| CPD108 | Ophthalmic acid                 | 50472    | 8108.8   | 6886.7   | 24616    | 25002    | 38898    | 3191.4   | 16044    | 0        | 6059.1   | 27866    | 6451.9   | 8972.6   | 10135    |
| CPD109 | Ornithine                       | 26983    | 14381    | 45662    | 12055    | 16652    | 15133    | 17754    | 36318    | 42359    | 104000   | 24359    | 94571    | 62603    | 15856    |
| CPD110 | Palmitate                       | 253000   | 688000   | 494000   | 280000   | 432000   | 571000   | 573000   | 275000   | 777000   | 535000   | 228000   | 192000   | 323000   | 681000   |
| CPD111 | Palmitoleic acid                | 20694    | 28950    | 17529    | 41080    | 86742    | 84589    | 34125    | 17546    | 53390    | 92454    | 34904    | 11751    | 23507    | 43025    |
| CPD112 | Petroselinic acid               | 133000   | 128000   | 104000   | 184000   | 482000   | 388000   | 160000   | 97167    | 338000   | 277000   | 144000   | 58916    | 239000   | 286000   |
| CPD113 | Phenylalanine                   | 2470000  | 2610000  | 1130000  | 1390000  | 951000   | 971000   | 1370000  | 3350000  | 7480000  | 6020000  | 2180000  | 13200000 | 8760000  | 1520000  |
| CPD114 | Phosphocholine chloride         | 3310000  | 22400000 | 11900000 | 7080000  | 2980000  | 6820000  | 22000000 | 6390000  | 31600000 | 16200000 | 5730000  | 23700000 | 21800000 | 15000000 |
| CPD115 | Phosphocreatine                 | 116000   | 279000   | 264000   | 141000   | 46002    | 82844    | 131000   | 349000   | 276000   | 202000   | 223000   | 148000   | 113000   | 220000   |
| CPD116 | Proline                         | 3770000  | 4860000  | 4750000  | 3010000  | 1980000  | 6350000  | 5220000  | 7790000  | 8860000  | 13400000 | 6070000  | 6230000  | 3530000  | 4530000  |
| CPD117 | Putrescine                      | 9076.1   | 5865.7   | 4517.8   | 23071    | 8904.7   | 46592    | 29007    | 9467.5   | 7931     | 20408    | 20738    | 57574    | 30859    | 27315    |
| CPD118 | Rac-glycerol-myristate          | 16071    | 5980     | 4485.5   | 63577    | 43133    | 37962    | 10025    | 67752    | 18042    | 70858    | 47246    | 29780    | 18033    | 26873    |
| CPD119 | Retinoate                       | 292000   | 258000   | 173000   | 774000   | 484000   | 858000   | 285000   | 777000   | 327000   | 1140000  | 640000   | 549000   | 232000   | 395000   |
| CPD120 | Riboflavin                      | 25266    | 17568    | 11224    | 24362    | 22246    | 35429    | 24844    | 52524    | 27385    | 66066    | 58012    | 37911    | 35238    | 33266    |
| CPD121 | Ribose                          | 8102.6   | 13250    | 12389    | 9077.1   | 14877    | 18016    | 14566    | 9485.7   | 12650    | 8880.6   | 9030.4   | 13038    | 9500.4   | 14508    |
| CPD122 | 5'-adenosyl-homocysteine        | 46957    | 41338    | 11840    | 18423    | 14472    | 17082    | 7897.5   | 15803    | 28308    | 37506    | 20468    | 49068    | 41180    | 22838    |
| CPD123 | Saccharic acid                  | 38767    | 57200    | 12037    | 14639    | 11853    | 41087    | 108000   | 8477.7   | 20110    | 19956    | 32694    | 53766    | 40559    | 13780    |
| CPD124 | Sarcosine                       | 419000   | 396000   | 384000   | 432000   | 274000   | 630000   | 475000   | 944000   | 745000   | 1370000  | 605000   | 1570000  | 956000   | 498000   |
| CPD125 | Serine                          | 140000   | 164000   | 141000   | 87010    | 81734    | 91093    | 110000   | 284000   | 308000   | 365000   | 170000   | 659000   | 384000   | 150000   |
| CPD126 | Sodium benzoate                 | 186000   | 224000   | 147000   | 37565    | 64791    | 11640    | 17107    | 36120    | 102000   | 42437    | 19836    | 8142     | 12139    | 14414    |
| CPD127 | Sodium gluconate                | 8752.2   | 22275    | 4363.7   | 7106.8   | 9684     | 41715    | 14280    | 8397.9   | 25435    | 10209    | 11553    | 7476.2   | 8479.6   | 7301.8   |
| CPD128 | Spermidine                      | 347000   | 299000   | 381000   | 673000   | 494000   | 1060000  | 729000   | 250000   | 606000   | 674000   | 927000   | 1880000  | 1240000  | 1430000  |

|        |                                     |             |             |             |             |             |             |             |             |             |             |             |             |             |             |
|--------|-------------------------------------|-------------|-------------|-------------|-------------|-------------|-------------|-------------|-------------|-------------|-------------|-------------|-------------|-------------|-------------|
| CPD129 | Sphinganine                         | 69873       | 90119       | 192000      | 116000      | 78366       | 111000      | 103000      | 325000      | 145000      | 170000      | 67402       | 228000      | 140000      | 146000      |
| CPD130 | Sphingomyelin                       | 118000      | 109000      | 59183       | 245000      | 155000      | 120000      | 93734       | 386000      | 210000      | 535000      | 169000      | 198000      | 135000      | 244000      |
| CPD131 | Stachyonse hydrate                  | 72268       | 15588       | 58227       | 104000      | 84492       | 178000      | 39431       | 42809       | 18110       | 46751       | 61173       | 55726       | 15155       | 56493       |
| CPD132 | Suberic acid                        | 17423       | 16388       | 32505       | 18597       | 31842       | 2621.1      | 11640       | 7527.5      | 5762.4      | 12147       | 7956        | 12087       | 6588.8      | 12958       |
| CPD133 | Succinate                           | 240000      | 81850       | 66527       | 99698       | 77553       | 38157       | 67433       | 85827       | 140000      | 90288       | 159000      | 283000      | 226000      | 70626       |
| CPD134 | Sucrose                             | 144000      | 25788       | 72472       | 286000      | 239000      | 731000      | 138000      | 174000      | 53189       | 190000      | 207000      | 233000      | 56103       | 121000      |
| CPD135 | Taurine                             | 2540000     | 4970000     | 4600000     | 4150000     | 2310000     | 3400000     | 4720000     | 7250000     | 4800000     | 5870000     | 3990000     | 7790000     | 4640000     | 5500000     |
| CPD136 | Theophylline                        | 226000      | 178000      | 93519       | 210000      | 103000      | 388000      | 237000      | 274000      | 330000      | 691000      | 414000      | 300000      | 447000      | 305000      |
| CPD137 | Threonine                           | 508000      | 782000      | 450000      | 260000      | 179000      | 409000      | 676000      | 975000      | 1080000     | 1500000     | 537000      | 1940000     | 1170000     | 786000      |
| CPD138 | Tocopherol                          | 243000      | 347000      | 85774       | 188000      | 65411       | 608000      | 374000      | 179000      | 488000      | 814000      | 435000      | 659000      | 337000      | 619000      |
| CPD139 | Trans-4-hydroxyproline              | 297000      | 602000      | 304000      | 300000      | 275000      | 775000      | 328000      | 781000      | 477000      | 969000      | 588000      | 620000      | 327000      | 413000      |
| CPD140 | Trigonelline                        | 3000000     | 4290000     | 1080000     | 9440000     | 4780000     | 7850000     | 6490000     | 4290000     | 5550000     | 7630000     | 12900000    | 6130000     | 6620000     | 11600000    |
| CPD141 | Tryptophan                          | 497000      | 447000      | 223000      | 267000      | 153000      | 210000      | 319000      | 648000      | 1190000     | 1210000     | 413000      | 1460000     | 1400000     | 305000      |
| CPD142 | Tyrosine                            | 291000      | 102000      | 78124       | 124000      | 132000      | 66026       | 56165       | 203000      | 82757       | 195000      | 123000      | 358000      | 256000      | 74620       |
| CPD143 | Urate                               | 170000      | 150000      | 76593       | 208000      | 103000      | 225000      | 296000      | 389000      | 341000      | 336000      | 215000      | 412000      | 296000      | 87293       |
| CPD144 | Uridine                             | 79170       | 70200       | 16864       | 47961       | 48114       | 1944.9      | 39326       | 30765       | 37346       | 24915       | 44384       | 30334       | 55581       | 40050       |
| CPD145 | UDP                                 | 11804       | 40951       | 63798       | 27378       | 12168       | 10998       | 12845       | 46547       | 40008       | 103000      | 27874       | 34234       | 28515       | 41937       |
| CPD146 | UDP-acetylgalactosamine             | 18502       | 315000      | 276000      | 126000      | 61884       | 35162       | 162000      | 316000      | 313000      | 185000      | 71604       | 143000      | 93496       | 256000      |
| CPD147 | UDP-acetylglucosamine               | 18502       | 315000      | 276000      | 126000      | 61884       | 35162       | 162000      | 316000      | 313000      | 185000      | 71604       | 143000      | 93496       | 256000      |
| CPD148 | UDP-galactose                       | 13676       | 212000      | 329000      | 51721       | 27963       | 44678       | 173000      | 140000      | 148000      | 123000      | 35646       | 50031       | 22533       | 110000      |
| CPD149 | UMP                                 | 127000      | 169000      | 164000      | 134000      | 149000      | 171000      | 427000      | 153000      | 230000      | 187000      | 164000      | 406000      | 318000      | 202000      |
| CPD150 | Valine                              | 33400000    | 33100000    | 16200000    | 19500000    | 14000000    | 28700000    | 27700000    | 49900000    | 41600000    | 53300000    | 44600000    | 32100000    | 20800000    | 32600000    |
| CPD151 | Xanthine                            | 62938       | 114000      | 30479       | 302000      | 119000      | 381000      | 263000      | 342000      | 203000      | 556000      | 408000      | 198000      | 241000      | 413000      |
| CPD152 | Aspartic acid                       | 268.5613106 | 250.3561376 | 220.2187711 | 214.5296262 | 430.6595522 | 214.353831  | 171.1677188 | 238.2063557 | 179.1565341 | 498.5883441 | 166.3305193 | 171.6538411 | 565.9711942 | 481.215776  |
| CPD153 | Deoxycholic acid                    | 1470.774477 | 667.9596063 | 894.4328531 | 922.0150397 | 1070.061993 | 959.0894618 | 1155.646871 | 173.2362093 | 690.7034903 | 781.9852508 | 311.7211618 | 1629.501938 | 650.8978849 | 1480.671277 |
| CPD154 | Phenylpyruvic acid                  | 433.6657594 | 339.3821923 | 1180.994932 | 822.0747371 | 1455.905135 | 786.8038468 | 475.0601117 | 1043.916378 | 621.4780523 | 2479.765338 | 462.3805476 | 257.1863928 | 1421.037574 | 1289.891478 |
| CPD155 | Resveratrol 3-O-glucuronide         | 9.440968549 | 33.89203042 | 50.29584424 | 4.198577851 | 7.925216615 | 1.519134521 | 20.49930228 | 2.958861048 | 5.80569455  | 12.54371104 | 3.407367807 | 0.927032441 | 4.309634445 | 2.138366699 |
| CPD156 | Retinyl Beta-glucuronide            | 304.0538682 | 2.33391777  | 5.381504912 | 411.2656918 | 562.9301597 | 102.8453137 | 16.46002877 | 66.52168993 | 2.95982458  | 58.69302639 | 449.6346167 | 121.4489636 | 47.36349199 | 215.9537448 |
| CPD157 | Phenylacetylamine                   | 879.9834913 | 395.8777675 | 202.5164227 | 341.7114337 | 168.7413101 | 157.3063922 | 265.7455036 | 468.2540253 | 514.5134426 | 623.6171427 | 386.2951531 | 1178.079956 | 870.0518929 | 192.9989956 |
| CPD158 | Oleamide                            | 1152.33116  | 1138.869808 | 452.8170479 | 951.6924282 | 1750.564821 | 780.506277  | 702.3863232 | 179.4757915 | 263.5561066 | 538.0192389 | 478.2738957 | 411.7639205 | 297.1954836 | 1012.049632 |
| CPD159 | Pipecolic acid                      | 917.156332  | 453.1268107 | 492.3324559 | 531.6460594 | 604.7676605 | 692.3460103 | 871.0055569 | 1033.533384 | 1394.639202 | 1024.808028 | 1323.519817 | 2111.534262 | 1785.140901 | 574.8522127 |
| CPD160 | Linoleoyl Ethanolamide              | 573.0097949 | 252.0706296 | 18.43481953 | 125.3561842 | 324.5855966 | 0.665937884 | 24.72391139 | 355.99579   | 252.232772  | 1175.724694 | 657.7430985 | 1148.57081  | 887.8701961 | 271.7444221 |
| CPD161 | Alloisoleucine                      | 10300.90162 | 10705.82773 | 7526.808972 | 2987.214881 | 3316.481235 | 6492.39177  | 5933.668606 | 9677.633765 | 17037.78866 | 12370.30292 | 7344.397995 | 23279.32207 | 18991.78173 | 4289.709537 |
| CPD162 | Kynurenine                          | 174.4022746 | 61.22609311 | 0           | 0           | 21.41359482 | 29.85380272 | 4.428137109 | 29.71419174 | 272.0417908 | 63.79779639 | 63.20887543 | 119.1929799 | 36.30514038 | 17.86745368 |
| CPD163 | Argininosuccinic acid               | 133.8960599 | 2.076115142 | 50.55171033 | 8.900181972 | 28.39048807 | 15.53109708 | 126.7456835 | 222.119125  | 328.8177261 | 221.5341392 | 148.7158459 | 243.62713   | 399.2520304 | 10.89526304 |
| CPD164 | 8,11,14-Eicosatetraynoic acid       | 158.0146798 | 33.9060286  | 17.64653619 | 117.4889201 | 1204.222377 | 3985.242739 | 172.7687359 | 64.7824676  | 442.7725207 | 614.3312763 | 653.4978097 | 72.33793173 | 355.4592168 | 165.7214322 |
| CPD165 | Hydroxyhexadocosahexaenoic acid     | 979.6610921 | 195.8972559 | 89.89189263 | 433.3163724 | 3521.431761 | 16798.49247 | 822.7136946 | 371.4969997 | 1829.755003 | 1737.064694 | 1666.598201 | 536.3537359 | 1123.409303 | 809.3078519 |
| CPD166 | Flavonol 3-O-D-galactoside          | 819.4833274 | 872.5789416 | 1237.183902 | 926.7695969 | 1259.404424 | 2154.413189 | 1500.489983 | 1202.514537 | 672.687364  | 699.8543791 | 1049.10641  | 853.5193116 | 924.3848498 | 1511.021927 |
| CPD167 | Monacolin J acid                    | 47.47173075 | 108.3186545 | 58.67138618 | 120.235939  | 124.6163367 | 76.08623478 | 25.21522846 | 130.3015282 | 115.9042218 | 96.51861966 | 252.4407521 | 198.4843295 | 104.5971687 | 369.5094308 |
| CPD168 | Kryptogenin                         | 194.6209561 | 19.3383894  | 6.423857954 | 4154.009306 | 1482.830634 | 3452.043684 | 447.7128037 | 138.5712603 | 23.81083116 | 181.7983673 | 1342.250784 | 182.7169423 | 387.8975358 | 106.5524813 |
| CPD169 | D-myo-Inositol 1,2-cyclic phosphate | 40.40805107 | 5.164298774 | 16.89088538 | 37.12733969 | 66.36971201 | 182.2349406 | 165.6924394 | 29.38306511 | 15.62281125 | 58.75396873 | 22.58800874 | 19.43707126 | 24.8408674  | 71.81239407 |
| CPD170 | N-Hydroxy-L-valine                  | 171.2465045 | 100.3294852 | 305.851339  | 42.25623384 | 84.90043746 | 60.45140355 | 105.8713143 | 211.546263  | 199.8885855 | 250.7469105 | 77.62467854 | 379.9181921 | 337.6879648 | 61.14223797 |
| CPD171 | Lipoic acid                         | 68.50414468 | 14.95980179 | 6.742729523 | 27.94442011 | 38.79431352 | 35.91573694 | 59.91556045 | 59.00647047 | 87.00567973 | 72.1372277  | 80.47756911 | 145.2481625 | 164.0947368 | 42.94003056 |
| CPD172 | 4-Sulfobenzoate                     | 79.54811583 | 17.37282154 | 21.53119848 | 64.35404792 | 24.62709199 | 17.55794485 | 7.93078793  | 2.961159107 | 8.647237249 | 19.92671224 | 2.046374614 | 16.86563558 | 35.02250057 | 13.56042685 |
| CPD173 | 4-Hydroxyphenylglyoxylate           | 60.12026128 | 67.8330518  | 13.04880484 | 28.52882941 | 34.30647046 | 10.76456481 | 7.697805811 | 9.938502197 | 12.73819765 | 8.62280699  | 5.649867876 | 10.26459893 | 20.49434862 | 5.309231468 |

|          |          |          |          |          |          |          |          |          |          |          |          |          |          |          |          |          |          |
|----------|----------|----------|----------|----------|----------|----------|----------|----------|----------|----------|----------|----------|----------|----------|----------|----------|----------|
| Liver 19 | Liver 20 | Liver 21 | Liver 22 | Liver 23 | Liver 24 | Liver 25 | Liver 26 | Liver 27 | Liver 28 | Liver 29 | Liver 30 | Liver 31 | Liver 32 | Liver 33 | Liver 34 | Liver 35 | Liver 36 |
| Control  | Control  | Control  | Control  | Control  | Control  | Control  | Control  | Control  | Nitrate  | Nitrate  | Nitrate  | Nitrate  | Nitrate  | Nitrate  | Nitrate  | Nitrate  | Nitrate  |
| 733000   | 709000   | 726000   | 1080000  | 1260000  | 910000   | 956000   | 863000   | 1010000  | 378000   | 798000   | 544000   | 636000   | 552000   | 811000   | 877000   | 392000   | 376000   |
| 165000   | 58112    | 47028    | 52846    | 25912    | 38168    | 25038    | 19419    | 60387    | 44511    | 42387    | 23115    | 42573    | 49332    | 115000   | 49911    | 19845    | 28319    |
| 208000   | 82473    | 65013    | 85956    | 29184    | 62141    | 85546    | 89760    | 113000   | 74861    | 72143    | 15299    | 45520    | 51585    | 175000   | 65523    | 84257    | 74136    |
| 684000   | 149000   | 195000   | 261000   | 153000   | 87885    | 177000   | 310000   | 265000   | 340000   | 286000   | 105000   | 343000   | 343000   | 666000   | 107000   | 230000   | 170000   |
| 3612.2   | 8098.4   | 4984.3   | 10016    | 10339    | 10637    | 8881     | 11154    | 0        | 1803.1   | 6960.8   | 4245.2   | 5479.8   | 6691.8   | 10033    | 13066    | 4874.9   | 13321    |
| 49545    | 34365    | 33686    | 43863    | 43485    | 29789    | 37807    | 41434    | 41142    | 38430    | 78344    | 42381    | 80075    | 54133    | 41122    | 1765.3   | 40629    | 46159    |
| 217000   | 129000   | 64362    | 49799    | 55129    | 24057    | 79227    | 49405    | 136000   | 50224    | 54839    | 23588    | 108000   | 101000   | 126000   | 55529    | 26413    | 10298    |
| 684000   | 149000   | 195000   | 261000   | 153000   | 87885    | 177000   | 310000   | 265000   | 340000   | 286000   | 105000   | 343000   | 343000   | 666000   | 107000   | 230000   | 170000   |
| 1440000  | 404000   | 437000   | 264000   | 184000   | 216000   | 296000   | 442000   | 154000   | 978000   | 927000   | 252000   | 409000   | 478000   | 648000   | 186000   | 120000   | 150000   |
| 1440000  | 404000   | 437000   | 264000   | 184000   | 216000   | 296000   | 442000   | 154000   | 978000   | 927000   | 252000   | 409000   | 478000   | 648000   | 186000   | 120000   | 150000   |
| 48400000 | 22600000 | 17900000 | 15700000 | 18200000 | 8810000  | 13700000 | 17200000 | 17900000 | 43100000 | 33800000 | 12500000 | 18500000 | 48000000 | 38100000 | 17900000 | 17000000 | 8460000  |
| 51449    | 14219    | 14960    | 60524    | 31577    | 19459    | 32030    | 21466    | 12391    | 7084.4   | 22310    | 41065    | 31816    | 22544    | 26583    | 8623.6   | 8692.6   | 27995    |
| 61955    | 208000   | 59916    | 57789    | 30058    | 60331    | 59502    | 68571    | 34290    | 308000   | 237000   | 23195    | 140000   | 421000   | 34190    | 71117    | 32244    | 26317    |
| 705000   | 300000   | 274000   | 813000   | 428000   | 643000   | 273000   | 497000   | 230000   | 282000   | 605000   | 494000   | 398000   | 618000   | 696000   | 357000   | 828000   | 879000   |
| 14838    | 5319.1   | 11950    | 8979.4   | 9760.4   | 40483    | 20700    | 9793.3   | 11180    | 14548    | 20182    | 8852.6   | 14590    | 58197    | 24893    | 11244    | 15718    | 28340    |
| 284000   | 269000   | 122000   | 196000   | 63144    | 63851    | 190000   | 241000   | 86229    | 260000   | 236000   | 41778    | 140000   | 93471    | 328000   | 40605    | 412000   | 237000   |
| 364000   | 843000   | 424000   | 48461    | 98761    | 130000   | 87897    | 239000   | 65119    | 321000   | 620000   | 316000   | 119000   | 111000   | 81701    | 87106    | 110000   | 90607    |
| 44146    | 27221    | 40533    | 19771    | 317000   | 21024    | 31573    | 46451    | 27234    | 52012    | 73136    | 315700   | 35757    | 29190    | 30876    | 11422    | 9057.1   | 23214    |
| 6450000  | 6310000  | 3080000  | 1610000  | 1720000  | 1640000  | 1980000  | 2580000  | 1440000  | 3120000  | 3130000  | 1290000  | 1630000  | 4040000  | 4010000  | 2210000  | 2260000  | 1110000  |
| 364000   | 781000   | 424000   | 17509    | 35386    | 130000   | 35972    | 199000   | 22976    | 243000   | 617000   | 295000   | 30411    | 41627    | 57071    | 48065    | 96895    | 27008    |
| 892000   | 577000   | 409000   | 322000   | 190000   | 194000   | 532000   | 325000   | 489000   | 406000   | 527000   | 191000   | 520000   | 504000   | 744000   | 372000   | 220000   | 194000   |
| 485000   | 732000   | 653000   | 245000   | 423000   | 167000   | 900000   | 254000   | 398000   | 413000   | 838000   | 257000   | 635000   | 952000   | 634000   | 729000   | 285000   | 232000   |
| 915000   | 335000   | 257000   | 142000   | 171000   | 133000   | 293000   | 177000   | 298000   | 303000   | 319000   | 126000   | 185000   | 343000   | 362000   | 238000   | 208000   | 125000   |
| 219000   | 112000   | 85244    | 48588    | 40911    | 40154    | 52835    | 63475    | 129000   | 89592    | 92270    | 27157    | 100000   | 53790    | 126000   | 55529    | 35446    | 35479    |
| 978000   | 877000   | 885000   | 820000   | 788000   | 651000   | 1930000  | 857000   | 1220000  | 1220000  | 835000   | 531000   | 3340000  | 2540000  | 1940000  | 1740000  | 1200000  | 890000   |
| 0        | 13617    | 17037    | 25628    | 19695    | 94714    | 3494.3   | 5703.7   | 141000   | 6801.4   | 13026    | 26357    | 12249    | 27913    | 3200.8   | 13045    | 20046    | 113000   |
| 152000   | 52724    | 57682    | 69572    | 28258    | 41005    | 71339    | 65142    | 64841    | 101000   | 62268    | 24163    | 248000   | 47678    | 165000   | 42559    | 69707    | 40124    |
| 266000   | 205000   | 129000   | 119000   | 63644    | 81443    | 122000   | 139000   | 207000   | 119000   | 70526    | 218000   | 167000   | 358000   | 127000   | 97793    | 132000   |          |
| 74392    | 36655    | 49755    | 108000   | 48880    | 56285    | 53170    | 55283    | 71862    | 46476    | 10562    | 49817    | 52986    | 34177    | 91977    | 39901    | 42438    | 49745    |
| 892000   | 577000   | 409000   | 322000   | 190000   | 194000   | 532000   | 325000   | 489000   | 406000   | 527000   | 191000   | 520000   | 504000   | 744000   | 372000   | 220000   | 194000   |
| 71930    | 45220    | 31038    | 12753    | 3846.7   | 22022    | 5624.1   | 58355    | 0        | 60538    | 45853    | 72389    | 9359     | 6338.4   | 11923    | 0        | 4206.3   | 23954    |
| 48400000 | 22600000 | 17900000 | 15700000 | 18200000 | 8810000  | 24600000 | 17200000 | 17900000 | 43100000 | 33800000 | 12500000 | 18500000 | 48000000 | 38100000 | 17900000 | 17000000 | 8460000  |
| 59160    | 22514    | 14696    | 23317    | 29055    | 21187    | 16334    | 18010    | 2318.9   | 26415    | 3250.8   | 307.53   | 1415.3   | 2460.7   | 39200    | 6967.6   | 2373.1   | 44086    |
| 876000   | 1150000  | 633000   | 510000   | 460000   | 495000   | 908000   | 489000   | 545000   | 579000   | 1030000  | 420000   | 1040000  | 456000   | 1050000  | 328000   | 576000   | 304000   |
| 1440000  | 404000   | 437000   | 264000   | 184000   | 216000   | 296000   | 442000   | 154000   | 978000   | 927000   | 252000   | 409000   | 478000   | 648000   | 186000   | 120000   | 150000   |
| 73005    | 106000   | 109000   | 31666    | 34138    | 21427    | 46372    | 52864    | 34538    | 117000   | 118000   | 53193    | 28222    | 71820    | 20073    | 16423    | 14043    | 10179    |
| 690000   | 681000   | 309000   | 241000   | 316000   | 127000   | 430000   | 374000   | 259000   | 354000   | 916000   | 149000   | 453000   | 957000   | 580000   | 512000   | 373000   | 212000   |
| 167000   | 172000   | 71356    | 44526    | 21412    | 9839.2   | 45481    | 60889    | 53522    | 83529    | 127000   | 38171    | 65750    | 77561    | 50717    | 33130    | 39031    | 24209    |
| 32900000 | 19600000 | 14000000 | 10800000 | 7350000  | 7260000  | 14100000 | 12300000 | 14500000 | 15200000 | 24400000 | 5230000  | 26700000 | 16200000 | 27500000 | 9270000  | 10900000 | 6490000  |
| 488000   | 385000   | 275000   | 74797    | 78052    | 52746    | 88048    | 127000   | 139000   | 269000   | 662000   | 104000   | 332000   | 298000   | 214000   | 139000   | 122000   | 95745    |
| 536000   | 6070000  | 3350000  | 196000   | 430000   | 533000   | 416000   | 179000   | 288000   | 368000   | 2790000  | 550000   | 262000   | 4370000  | 437000   | 699000   | 881000   | 293000   |
| 53366    | 19260    | 19404    | 64396    | 55705    | 66768    | 58565    | 47821    | 51118    | 137000   | 40174    | 37842    | 77901    | 51916    | 70587    | 42683    | 50853    | 81033    |
| 491000   | 1080000  | 411000   | 163000   | 228000   | 167000   | 424000   | 223000   | 379000   | 173000   | 645000   | 177000   | 286000   | 672000   | 594000   | 347000   | 332000   | 150000   |
| 20726    | 51431    | 40225    | 8132.4   | 9084.4   | 14131    | 16069    | 52288    | 13065    | 29174    | 32754    | 73970    | 9174.8   | 10591    | 5922.6   | 14879    | 4266.6   | 0        |
| 311000   | 117000   | 46119    | 64849    | 45655    | 45085    | 74724    | 58819    | 78279    | 114000   | 58743    | 38816    | 68743    | 73128    | 268000   | 80423    | 60607    | 47562    |
| 708000   | 313000   | 276000   | 811000   | 428000   | 649000   | 267000   | 633000   | 227000   | 379000   | 610000   | 494000   | 204000   | 373000   | 694000   | 275000   | 829000   | 707000   |
| 12120    | 59487    | 7940.2   | 9182.7   | 12199    | 12461    | 9802.3   | 14259    | 48642    | 53240    | 8820     | 18523    | 31333    | 8544.3   | 11794    | 54896    | 9279.5   | 21684    |
| 311000   | 117000   | 46119    | 64849    | 45655    | 45085    | 74724    | 58819    | 78279    | 114000   | 58743    | 38816    | 68743    | 73128    | 268000   | 80423    | 60607    | 47562    |
| 74795    | 14065    | 13101    | 21364    | 17516    | 8221     | 31100    | 10239    | 25038    | 10849    | 15892    | 17029    | 62583    | 31364    | 18846    | 20323    | 10061    |          |
| 144000   | 90568    | 89768    | 62892    | 75555    | 42309    | 114000   | 38173    | 118000   | 110000   | 97226    | 41160    | 154000   | 144000   | 172000   | 42277    | 57242    | 34462    |
| 57528    | 66526    | 52853    | 87846    | 67041    | 74822    | 75381    | 80794    | 44479    | 43005    | 34126    | 86251    | 29883    | 55632    | 71703    | 46120    | 46645    | 80276    |
| 964000   | 1570000  | 881000   | 165000   | 765000   | 300000   | 877000   | 443000   | 559000   | 468000   | 1850000  | 274000   | 1180000  | 990000   | 756000   | 557000   | 574000   | 277000   |
| 45130    | 49694    | 38339    | 19430    | 15157    | 12631    | 27243    | 6720.3   | 35630    | 25555    | 33593    | 9745.7   | 93268    | 42669    | 29724    | 33364    | 24960    | 9930.9   |
| 149000   | 153000   | 93896    | 348000   | 139000   | 104000   | 311000   | 477000   | 437000   | 1460000  | 157000   | 281000   | 884000   | 116000   | 255000   | 156000   | 286000   | 381000   |
| 12161    | 4748.8   | 4962.3   | 16287    | 6155.5   | 9569.3   | 6223.3   | 21952    | 12621    | 82859    | 9665.6   | 17044    | 19826    | 2458.4   | 17422    | 0        | 11186    | 24297    |
| 71569    | 87058    | 38092    | 44416    | 30781    | 26020    | 48025    | 46154    | 50982    | 34858    | 55161    | 19620    | 68834    | 71830    | 112000   | 70379    | 27990    | 39235    |
| 346000   | 115000   | 84750    | 155000   | 52902    | 61489    | 119000   | 117000   | 150000   | 96071    | 111000   | 40429    | 83021    | 84163    | 270000   | 92372    | 124000   | 108000   |
| 1413     | 4295.1   | 0        | 3333.6   | 6288.1   | 4897     | 3300.9   | 7454.7   | 5101.5   | 0        | 12617    | 7118.6   | 13329    | 69597    | 6083.8   | 10814    | 0        | 0        |
| 116000   | 177000   | 77123    | 13334    | 22646    | 26909    | 18509    | 114000   | 39078    | 135000   | 104000   | 108000   | 37524    | 23826    | 21840    | 14527    | 23812    | 20648    |
| 43765    | 76362    | 65560    | 42350    | 55432    | 56726    | 74061    | 66867    | 57861    | 57957    | 64400    | 50898    | 82053    | 69084    | 46810    | 56138    | 59737    | 63267    |
| 23297    | 6921.8   | 32710    | 6192.8   | 37102    | 8671.7   | 56681    | 14976    | 25353    | 13236    | 31007    | 28448    | 25821    | 75183    | 30458    | 45664    | 27363    | 6037.2   |
| 291000   | 78292    | 215000   | 150000   | 170000   | 275000   | 233000   | 135000   |          |          |          |          |          |          |          |          |          |          |

|          |          |          |          |          |         |          |          |          |          |          |          |          |          |          |          |          |         |
|----------|----------|----------|----------|----------|---------|----------|----------|----------|----------|----------|----------|----------|----------|----------|----------|----------|---------|
| 458000   | 1640000  | 417000   | 918000   | 892000   | 804000  | 1010000  | 740000   | 1750000  | 1530000  | 495000   | 689000   | 1060000  | 576000   | 874000   | 1720000  | 421000   | 677000  |
| 47246    | 37248    | 45382    | 72080    | 64688    | 67190   | 46895    | 72026    | 61507    | 64365    | 43725    | 32059    | 36391    | 38977    | 26676    | 53033    | 37533    | 77183   |
| 5170000  | 2390000  | 1590000  | 1910000  | 817000   | 904000  | 1540000  | 2850000  | 2240000  | 2860000  | 1720000  | 806000   | 4280000  | 1850000  | 6750000  | 1340000  | 1650000  | 1050000 |
| 39345    | 126000   | 36370    | 92843    | 45786    | 70579   | 65255    | 90381    | 124000   | 105000   | 22736    | 65617    | 146000   | 21609    | 92752    | 204000   | 50156    | 133000  |
| 2720     | 2153.9   | 3388.9   | 3590.1   | 4085.9   | 4543.7  | 3007.1   | 7573.8   | 3202.3   | 545.93   | 12611    | 6364.8   | 13647    | 71307    | 4254.8   | 1237.4   | 1814.4   | 1396.9  |
| 16800000 | 2260000  | 5140000  | 3550000  | 4950000  | 391000  | 9630000  | 6400000  | 10700000 | 689000   | 5400000  | 306000   | 11800000 | 15600000 | 8240000  | 5860000  | 9720000  | 1330000 |
| 697000   | 339000   | 433000   | 518000   | 349000   | 455000  | 498000   | 544000   | 430000   | 349000   | 362000   | 328000   | 303000   | 303000   | 552000   | 273000   | 230000   | 517000  |
| 91968    | 54628    | 38866    | 30406    | 20400    | 19816   | 53286    | 27719    | 45112    | 22951    | 38237    | 14417    | 57777    | 48082    | 69187    | 35872    | 20228    | 13988   |
| 448000   | 83574    | 62251    | 200000   | 59689    | 35423   | 28843    | 254000   | 157000   | 229000   | 111000   | 66817    | 412000   | 189000   | 250000   | 21575    | 104000   | 58200   |
| 49395    | 15720    | 14230    | 73229    | 33306    | 59434   | 36404    | 85939    | 23007    | 27305    | 40874    | 31742    | 68358    | 56459    | 66728    | 14428    | 49084    | 73137   |
| 752000   | 577000   | 302000   | 118000   | 107000   | 90493   | 174000   | 286000   | 233000   | 343000   | 320000   | 133000   | 160000   | 298000   | 259000   | 172000   | 143000   | 97296   |
| 915000   | 335000   | 445000   | 142000   | 171000   | 133000  | 293000   | 177000   | 298000   | 303000   | 538000   | 171000   | 185000   | 709000   | 362000   | 238000   | 208000   | 125000  |
| 6290000  | 4410000  | 2460000  | 1320000  | 1680000  | 1150000 | 2590000  | 1480000  | 3620000  | 3190000  | 3650000  | 1090000  | 2480000  | 5070000  | 5300000  | 2600000  | 1220000  | 775000  |
| 2640000  | 1710000  | 2790000  | 1340000  | 756000   | 626000  | 1650000  | 1540000  | 1570000  | 1680000  | 1850000  | 648000   | 990000   | 1160000  | 2850000  | 1140000  | 804000   | 677000  |
| 485000   | 732000   | 653000   | 245000   | 423000   | 167000  | 900000   | 254000   | 398000   | 413000   | 838000   | 257000   | 635000   | 952000   | 634000   | 729000   | 285000   | 232000  |
| 49545    | 28811    | 33686    | 43863    | 43485    | 29789   | 37807    | 41434    | 41142    | 24012    | 78344    | 42381    | 80075    | 54133    | 40858    | 32404    | 40629    | 19181   |
| 45415    | 137000   | 29874    | 16910    | 25203    | 29663   | 46076    | 15803    | 22818    | 15815    | 85760    | 9686.6   | 20493    | 49087    | 22772    | 31520    | 21050    | 8640.1  |
| 4850000  | 2300000  | 2380000  | 2240000  | 1480000  | 926000  | 1600000  | 2580000  | 3060000  | 2880000  | 2460000  | 842000   | 4370000  | 4630000  | 4330000  | 1130000  | 1410000  | 1070000 |
| 495000   | 173000   | 595000   | 898000   | 663000   | 707000  | 705000   | 826000   | 613000   | 354000   | 592000   | 689000   | 1060000  | 853000   | 782000   | 294000   | 506000   | 1080000 |
| 2020000  | 1270000  | 1370000  | 548000   | 453000   | 412000  | 717000   | 768000   | 1010000  | 1090000  | 1600000  | 608000   | 807000   | 1040000  | 1750000  | 1290000  | 443000   | 332000  |
| 960000   | 713000   | 1580000  | 788000   | 1080000  | 1160000 | 678000   | 885000   | 784000   | 687000   | 1340000  | 1180000  | 725000   | 1110000  | 1080000  | 1610000  | 1070000  | 1120000 |
| 3660000  | 3770000  | 2480000  | 1270000  | 1400000  | 774000  | 2580000  | 1460000  | 2640000  | 2380000  | 3750000  | 920000   | 6690000  | 4550000  | 2930000  | 2320000  | 1550000  | 808000  |
| 28055    | 37390    | 52170    | 22098    | 19993    | 12546   | 36034    | 27044    | 335000   | 48068    | 33195    | 22835    | 15684    | 46564    | 29951    | 33598    | 13326    | 6574.5  |
| 389000   | 269000   | 215000   | 163000   | 135000   | 99465   | 240000   | 209000   | 186000   | 179000   | 225000   | 91598    | 369000   | 418000   | 491000   | 216000   | 160000   | 118000  |
| 307000   | 106000   | 73523    | 372000   | 41812    | 78913   | 195000   | 478000   | 306000   | 2500000  | 301000   | 67785    | 1170000  | 80648    | 580000   | 55578    | 296000   | 490000  |
| 13104    | 27369    | 9398.4   | 23619    | 19695    | 19056   | 10807    | 34022    | 18858    | 24706    | 12029    | 30814    | 23601    | 10705    | 29869    | 31050    | 13547    | 72742   |
| 34409    | 36781    | 7388.2   | 22073    | 6374.2   | 5665.8  | 13027    | 25658    | 16028    | 42005    | 23615    | 2685     | 71610    | 17501    | 22863    | 7376     | 23010    | 3729.8  |
| 3660000  | 3770000  | 2480000  | 1270000  | 1400000  | 774000  | 2580000  | 1460000  | 2640000  | 2380000  | 3750000  | 920000   | 6690000  | 4550000  | 2930000  | 2320000  | 1550000  | 808000  |
| 864000   | 454000   | 712000   | 466000   | 481000   | 282000  | 920000   | 497000   | 754000   | 547000   | 593000   | 282000   | 1450000  | 1440000  | 1100000  | 714000   | 566000   | 365000  |
| 269000   | 430000   | 430000   | 294000   | 379000   | 399000  | 526000   | 441000   | 333000   | 332000   | 457000   | 320000   | 484000   | 450000   | 290000   | 319000   | 351000   | 354000  |
| 41698    | 76129    | 67822    | 43512    | 56199    | 57821   | 75198    | 67021    | 58411    | 51923    | 65240    | 50235    | 66727    | 70167    | 44361    | 49763    | 57004    | 64681   |
| 5452.2   | 1180.8   | 2684.9   | 1400     | 3195.4   | 4119.4  | 3354     | 2415.4   | 1967     | 588.29   | 622.72   | 3039.6   | 962.78   | 956.46   | 6513.1   | 0        | 3643.5   | 0       |
| 61540    | 71423    | 62929    | 71112    | 50934    | 78902   | 98106    | 71424    | 71552    | 61535    | 91392    | 62699    | 154000   | 94449    | 72292    | 46865    | 64615    | 102000  |
| 19502    | 26330    | 15946    | 62533    | 27586    | 39110   | 49734    | 90099    | 78054    | 158000   | 12090    | 42136    | 77523    | 15379    | 37650    | 45540    | 26478    | 69978   |
| 31933    | 13591    | 35006    | 23280    | 11788    | 17731   | 14226    | 25216    | 22415    | 35493    | 26135    | 21787    | 7451.9   | 6651.9   | 16926    | 13182    | 17755    | 30317   |
| 118000   | 204000   | 106000   | 194000   | 118000   | 169000  | 125000   | 276000   | 242000   | 262000   | 79576    | 122000   | 228000   | 68457    | 290000   | 212000   | 130000   | 220000  |
| 219000   | 112000   | 85244    | 48588    | 40911    | 40154   | 52835    | 63475    | 129000   | 89592    | 92270    | 27157    | 100000   | 53790    | 126000   | 55529    | 35446    | 35479   |
| 649000   | 254000   | 172000   | 180000   | 85410    | 78606   | 115000   | 147000   | 160000   | 329000   | 259000   | 73536    | 316000   | 198000   | 426000   | 113000   | 127000   | 81639   |
| 860000   | 614000   | 416000   | 484000   | 198000   | 403000  | 461000   | 673000   | 479000   | 519000   | 544000   | 279000   | 506000   | 306000   | 550000   | 349000   | 430000   | 736000  |
| 580000   | 240000   | 262000   | 428000   | 189000   | 513000  | 408000   | 374000   | 1390000  | 1280000  | 408000   | 549000   | 1810000  | 1760000  | 1210000  | 219000   | 465000   | 150000  |
| 1810000  | 854000   | 774000   | 830000   | 819000   | 246000  | 910000   | 1120000  | 2390000  | 1320000  | 1460000  | 605000   | 1790000  | 1420000  | 1930000  | 655000   | 281000   | 397000  |
| 48400000 | 22600000 | 17900000 | 15700000 | 18200000 | 8810000 | 24600000 | 17200000 | 17900000 | 43100000 | 33800000 | 12500000 | 18500000 | 48000000 | 38100000 | 17900000 | 17000000 | 8460000 |
| 68802    | 205000   | 106000   | 194000   | 118000   | 104000  | 50779    | 275000   | 238000   | 261000   | 79184    | 76123    | 275000   | 68286    | 286000   | 210000   | 128000   | 219000  |
| 13703    | 11529    | 6412.6   | 7276.6   | 3698.9   | 4938    | 6650.8   | 10080    | 6531.3   | 9542.5   | 9089.6   | 2608.7   | 13342    | 7860.2   | 23860    | 3686.8   | 5852.3   | 3418.4  |
| 32572    | 0        | 7475.6   | 14472    | 0        | 5923.2  | 2012.8   | 8003.8   | 0        | 13405    | 1934.2   | 1916.6   | 7501.7   | 2147.2   | 7018.4   | 0        | 2458.9   | 7507.8  |
| 74795    | 14065    | 13101    | 21364    | 17516    | 8221    | 31100    | 10239    | 25038    | 10849    | 15892    | 17029    | 11948    | 62583    | 31364    | 18846    | 20323    | 10061   |
| 514000   | 707000   | 469000   | 680000   | 485000   | 642000  | 687000   | 839000   | 1120000  | 1370000  | 391000   | 626000   | 877000   | 328000   | 724000   | 735000   | 613000   | 742000  |
| 24167    | 22748    | 22326    | 50324    | 19162    | 45408   | 67379    | 121000   | 86791    | 376000   | 41154    | 68095    | 310000   | 19580    | 56250    | 36556    | 48696    | 141000  |
| 149000   | 153000   | 93896    | 348000   | 139000   | 104000  | 311000   | 477000   | 437000   | 1460000  | 157000   | 281000   | 884000   | 116000   | 255000   | 156000   | 286000   | 381000  |
| 1510000  | 2630000  | 1270000  | 567000   | 853000   | 553000  | 1510000  | 737000   | 1270000  | 1800000  | 2330000  | 560000   | 4890000  | 2610000  | 1430000  | 949000   | 983000   | 449000  |
| 5640000  | 26200000 | 13500000 | 2940000  | 13700000 | 4740000 | 12500000 | 1350000  | 18600000 | 17800000 | 3550000  | 8510000  | 26900000 | 2780000  | 9420000  | 8930000  | 1450000  |         |
| 488000   | 385000   | 275000   | 74797    | 78052    | 52746   | 88048    | 127000   | 139000   | 269000   | 662000   | 104000   | 332000   | 298000   | 214000   | 139000   | 122000   | 95745   |
| 5600000  | 3160000  | 3440000  | 2520000  | 2050000  | 1540000 | 5770000  | 1520000  | 2250000  | 6060000  | 3870000  | 1890000  | 4990000  | 5880000  | 7490000  | 4060000  | 2000000  | 1950000 |
| 10190    | 9284.7   | 5043     | 10148    | 12233    | 14287   | 28525    | 9345.1   | 14791    | 7053.7   | 11343    | 1897     | 23223    | 60281    | 22144    | 27844    | 11366    | 9162.4  |
| 31784    | 6883.6   | 7930.5   | 29133    | 2842.8   | 11549   | 21356    | 64617    | 30525    | 387000   | 27453    | 7676.2   | 165000   | 7407.1   | 37924    | 7433.7   | 27780    | 56466   |
| 352000   | 218000   | 223000   | 467000   | 84687    | 103000  | 329000   | 605000   | 613000   | 2190000  | 463000   | 80256    | 1240000  | 223000   | 636000   | 197000   | 271000   | 335000  |
| 34219    | 15749    | 15414    | 16971    | 12430    | 8612.1  | 34905    | 37948    | 30487    | 27854    | 21625    | 12686    | 46251    | 28279    | 43500    | 10803    | 31604    | 13614   |
| 11073    | 25334    | 13341    | 20776    | 21918    | 18643   | 21954    | 18278    | 31122    | 24884    | 12438    | 10700    | 26501    | 17117    | 15033    | 31878    | 17755    | 22790   |
| 16157    | 28238    | 27694    | 21550    | 29722    | 17480   | 11238    | 7819.5   | 32754    | 24959    | 37131    | 36098    | 21065    | 9041.8   | 28368    | 5178.5   |          |         |
| 23297    | 6921.8   | 32710    | 6192.8   | 37102    | 8671.7  | 56681    | 14976    | 25353    | 13236    | 31007    | 28448    | 25821    | 75183    | 30458    | 45664    | 27363    | 6037.2  |
| 892000   | 577000   | 409000   | 322000   | 190000   | 194000  | 532000   | 325000   | 489000   | 406000   | 527000   | 191000   | 520000   | 504000   | 744000   | 372000   | 220000   | 194000  |
| 226000   | 171000   | 148000   | 75556    | 81731    | 65362   | 167000   | 66706    | 124000   | 81570    | 144000   | 53717    | 168000   | 155000   | 172000   | 133000   | 73111    | 57      |

|             |             |             |             |             |             |             |             |             |             |             |             |             |             |             |             |             |             |
|-------------|-------------|-------------|-------------|-------------|-------------|-------------|-------------|-------------|-------------|-------------|-------------|-------------|-------------|-------------|-------------|-------------|-------------|
| 299000      | 145000      | 110000      | 157000      | 55793       | 71497       | 64795       | 38323       | 123000      | 97384       | 95047       | 59291       | 74100       | 109000      | 224000      | 132000      | 45006       | 67629       |
| 545000      | 279000      | 156000      | 243000      | 51108       | 33781       | 94305       | 345000      | 252000      | 223000      | 132000      | 30425       | 262000      | 172000      | 538000      | 36818       | 112000      | 82185       |
| 112000      | 17836       | 25740       | 217000      | 41613       | 86890       | 38969       | 131000      | 89096       | 77697       | 18396       | 22817       | 61276       | 15527       | 121000      | 40713       | 81164       | 80967       |
| 28179       | 4201.8      | 9961.6      | 32876       | 11608       | 13162       | 15753       | 20160       | 13265       | 16362       | 3137.7      | 15453       | 9047.9      | 17277       | 31930       | 12532       | 15557       | 9606.8      |
| 61540       | 71423       | 62929       | 71112       | 50934       | 78902       | 98106       | 71424       | 71552       | 61535       | 91392       | 62699       | 154000      | 94449       | 72292       | 46865       | 64615       | 102000      |
| 424000      | 36273       | 72846       | 246000      | 73918       | 277000      | 159000      | 263000      | 400000      | 322000      | 91504       | 176000      | 227000      | 36058       | 410000      | 167000      | 148000      | 419000      |
| 9950000     | 6950000     | 4820000     | 3540000     | 3190000     | 2280000     | 4620000     | 3000000     | 4400000     | 3480000     | 5610000     | 2070000     | 5390000     | 6940000     | 7590000     | 4740000     | 3750000     | 2790000     |
| 526000      | 400000      | 216000      | 116000      | 145000      | 105000      | 240000      | 126000      | 362000      | 300000      | 353000      | 114000      | 223000      | 434000      | 496000      | 216000      | 116000      | 66976       |
| 485000      | 732000      | 653000      | 245000      | 423000      | 167000      | 900000      | 254000      | 398000      | 413000      | 838000      | 257000      | 635000      | 952000      | 634000      | 729000      | 285000      | 232000      |
| 1490000     | 644000      | 381000      | 108000      | 29276       | 14295       | 388000      | 731000      | 772000      | 220000      | 270000      | 19932       | 316000      | 362000      | 1470000     | 216000      | 626000      | 29282       |
| 1440000     | 404000      | 437000      | 264000      | 184000      | 216000      | 296000      | 442000      | 154000      | 978000      | 927000      | 252000      | 409000      | 478000      | 648000      | 186000      | 120000      | 150000      |
| 2790000     | 3770000     | 3420000     | 2490000     | 1980000     | 2260000     | 3890000     | 3450000     | 5770000     | 2930000     | 3200000     | 1260000     | 2570000     | 3480000     | 3690000     | 2880000     | 1820000     | 1370000     |
| 278000      | 478000      | 242000      | 137000      | 157000      | 95784       | 385000      | 167000      | 526000      | 241000      | 395000      | 94124       | 975000      | 531000      | 304000      | 169000      | 196000      | 74725       |
| 42609       | 45495       | 71069       | 94368       | 66846       | 94224       | 78203       | 77645       | 38390       | 66768       | 79800       | 112000      | 115000      | 52275       | 65457       | 61645       | 76903       | 102000      |
| 491000      | 439000      | 298000      | 161000      | 234000      | 6047.7      | 354000      | 176000      | 287000      | 153000      | 337000      | 32011       | 406000      | 530000      | 292000      | 159000      | 200000      | 12468       |
| 17095       | 16140       | 22757       | 43040       | 28743       | 32016       | 55635       | 36774       | 33488       | 14730       | 32558       | 24429       | 84741       | 22116       | 26676       | 0           | 36341       | 85672       |
| 174000      | 120000      | 58210       | 13533       | 11635       | 20284       | 9501.3      | 41451       | 36421       | 33786       | 51977       | 38746       | 20630       | 6291.4      | 36915       | 41219       | 25199       | 15476       |
| 240000      | 355000      | 323000      | 52236       | 102000      | 133000      | 112000      | 108000      | 151000      | 144000      | 434000      | 217000      | 200000      | 110000      | 50437       | 108000      | 127000      | 91758       |
| 240000      | 355000      | 323000      | 52236       | 102000      | 133000      | 112000      | 108000      | 151000      | 144000      | 434000      | 217000      | 200000      | 110000      | 50437       | 108000      | 127000      | 91758       |
| 262000      | 305000      | 358000      | 55345       | 148000      | 80707       | 91217       | 112000      | 87720       | 110000      | 493000      | 266000      | 35681       | 89775       | 51770       | 95841       | 85278       | 144000      |
| 207000      | 241000      | 372000      | 242000      | 380000      | 246000      | 497000      | 241000      | 143000      | 110000      | 320000      | 198000      | 87263       | 319000      | 129000      | 215000      | 261000      | 253000      |
| 48400000    | 22600000    | 17900000    | 15700000    | 18200000    | 8810000     | 13700000    | 17200000    | 17900000    | 43100000    | 33800000    | 12500000    | 18500000    | 48000000    | 38100000    | 17900000    | 17000000    | 8460000     |
| 740000      | 323000      | 303000      | 128000      | 317000      | 70600       | 314000      | 284000      | 340000      | 279000      | 287000      | 53970       | 364000      | 714000      | 560000      | 154000      | 190000      | 73173       |
| 218.6970132 | 77.43219293 | 252.7801073 | 243.1350212 | 137.2780495 | 486.7658525 | 334.3434219 | 134.3742701 | 399.5152231 | 253.3187481 | 242.7502526 | 512.5464182 | 429.2368874 | 274.6878665 | 168.8206063 | 236.4346355 | 650.7526104 | 927.8413034 |
| 953.900176  | 724.4582518 | 971.2993369 | 1060.109269 | 888.2024212 | 1042.017268 | 662.6529738 | 944.8448291 | 7173.776859 | 1260.140991 | 3737.523333 | 921.1706321 | 1063.711181 | 916.9232825 | 1201.600006 | 1043.76165  | 783.4372904 | 944.8913623 |
| 911.6744717 | 219.2920455 | 786.4404078 | 549.182629  | 243.5940373 | 3059.726291 | 2602.324994 | 377.0554429 | 968.3681618 | 1314.209308 | 1143.601874 | 1593.894392 | 971.6143136 | 1370.00277  | 693.0902719 | 788.2493987 | 4956.253881 | 5357.621341 |
| 28.67235151 | 12.7536138  | 30.59131246 | 101.4486249 | 166.3580884 | 123.4030364 | 172.6936819 | 480.5689504 | 35.25965685 | 2.876668829 | 3.79989624  | 20.7626102  | 101.4237926 | 29.80266333 | 15.29238004 | 6.316075139 | 8.474285037 | 1.070571929 |
| 93.93333083 | 166.5582558 | 385.0307557 | 481.8290216 | 4110.458987 | 434.2977081 | 1442.787708 | 131.6648741 | 168.5172874 | 114.9815626 | 448.7002211 | 1025.393425 | 108.9996809 | 2220.444534 | 47.09116553 | 193.6444767 | 126.7163574 | 112.6727472 |
| 201.6057755 | 165.8940461 | 233.373818  | 217.2657644 | 213.7143962 | 247.8371045 | 222.130402  | 264.6002386 | 243.9839586 | 280.4725875 | 102.0340561 | 308.0871309 | 461.2721177 | 235.8314638 | 110.529898  | 178.626448  | 174.7252659 | 211.6296346 |
| 659.9797425 | 371.8327479 | 463.5073679 | 824.8731224 | 24.66615941 | 146.2405922 | 438.9043326 | 404.4252015 | 972.2961289 | 402.6340703 | 205.8571905 | 37.21267463 | 537.5281139 | 373.6185124 | 580.6270394 | 279.0735905 | 536.9518744 | 86.05721363 |
| 482.5089137 | 621.0669479 | 1104.940226 | 513.0695357 | 1395.988955 | 839.5589714 | 1389.110088 | 625.3170645 | 858.8733757 | 638.2476755 | 889.757736  | 1183.679129 | 1017.593764 | 1789.669212 | 798.0667818 | 1658.734409 | 945.1754641 | 761.1404343 |
| 22.2212918  | 19.62430855 | 286.1523945 | 12.13050416 | 0           | 0           | 0.619814923 | 0           | 2.437970065 | 449.3822249 | 1798.767808 | 10.74490117 | 44.44914574 | 3.683391989 | 63.98212934 | 143.0964626 | 25.78008642 | 10.21352939 |
| 4151.622989 | 7523.720179 | 6715.338543 | 3046.941594 | 7526.447958 | 4210.035378 | 7832.561372 | 2960.762016 | 5683.648312 | 4963.53714  | 9141.109531 | 7233.130845 | 7838.651907 | 10942.24839 | 4072.780596 | 8465.203293 | 4964.869178 | 3028.304882 |
| 7.392262505 | 57.33946787 | 167.1240097 | 35.47091706 | 37.3284343  | 14.8689965  | 89.03797687 | 7.786010068 | 789.6641103 | 48.87690624 | 55.80289057 | 35.58304384 | 10.88987963 | 106.6442661 | 14.34240771 | 80.4490718  | 27.12478752 | 1.345224487 |
| 13.99407412 | 7.898657472 | 66.00826878 | 35.78089915 | 18.39169352 | 13.88602435 | 121.2264101 | 51.20397482 | 39.69938193 | 37.25501768 | 13.2330814  | 38.50714349 | 15.55168994 | 60.7190753  | 62.74598766 | 138.7429461 | 11.07563271 | 19.42514076 |
| 19.99658178 | 18.33809364 | 410.6860841 | 292.1531406 | 21.44492064 | 425.6182545 | 175.0517747 | 572.2928223 | 135.730537  | 1020.720105 | 1411.914379 | 440.3733431 | 260.6745138 | 180.7854184 | 96.76061616 | 221.1779121 | 155.0180391 | 372.6779887 |
| 206.810917  | 103.3120171 | 1249.405879 | 954.4711459 | 191.7609425 | 1402.381268 | 666.2955541 | 2008.735734 | 447.2951259 | 2724.009049 | 5382.062679 | 719.694528  | 1032.950145 | 565.9204676 | 361.5704308 | 1255.147498 | 480.0797753 | 2059.674348 |
| 3818.27472  | 2932.342744 | 1613.656361 | 1619.658405 | 2353.414462 | 2686.420998 | 2315.025469 | 1159.717694 | 2032.932899 | 1319.353026 | 1582.047131 | 2861.911917 | 895.0056991 | 3380.097574 | 1889.418217 | 3252.813886 | 1901.841833 | 2199.294683 |
| 50.52695412 | 2.828802955 | 12.67648083 | 52.3954462  | 6.387283789 | 141.1935861 | 15.3720704  | 74.62468728 | 21.95961087 | 53.82205731 | 4.586105734 | 176.5863308 | 144.7435563 | 2.357053203 | 32.05106221 | 0           | 341.4971345 | 565.2901819 |
| 44.90776503 | 80.42184263 | 29.76441313 | 297.540559  | 176.462027  | 390.2341084 | 165.7687629 | 4646.47337  | 651.0429293 | 142.2967598 | 27.42726322 | 41.98413646 | 3388.197008 | 631.8043823 | 172.2443918 | 155.0560179 | 5795.483708 | 918.6101354 |
| 296.8865414 | 120.9330583 | 203.9837278 | 36.27033405 | 254.9118905 | 139.2599467 | 222.8216898 | 102.4918541 | 315.706679  | 99.77640375 | 227.5671825 | 238.927956  | 28.89566007 | 217.2026419 | 146.6214763 | 161.1995624 | 91.04496039 | 93.28439277 |
| 179.126412  | 60.49927899 | 61.71659818 | 62.9971347  | 154.3931287 | 54.28358109 | 145.3819406 | 41.92414561 | 72.20156993 | 24.97133921 | 78.84932592 | 164.1382373 | 82.43429851 | 198.4125011 | 108.2694129 | 277.8681245 | 95.3108231  | 85.96087794 |
| 25.25327688 | 21.09847406 | 70.81880162 | 38.18888963 | 60.9335864  | 23.00466554 | 81.75688433 | 25.22962348 | 50.16884038 | 33.16705966 | 45.18063723 | 52.28730639 | 80.79891661 | 95.69579667 | 38.08968365 | 71.10454906 | 50.80748774 | 29.09363346 |
| 0.377573206 | 2.542886281 | 14.09276217 | 10.77538677 | 97.16248287 | 8.37201805  | 8.349320194 | 11.36633694 | 0           | 56.15026395 | 14.07410443 | 18.95684847 | 1.172661252 | 11.66750372 | 4.380533469 | 0.419203232 | 2.891483315 | 31.05673267 |
| 5.276507266 | 5.789482433 | 26.46153383 | 9.368958651 | 69.97183282 | 13.1186049  | 7.255652006 | 16.85422177 | 0.258119956 | 23.86590032 | 13.93204655 | 15.7781912  | 24.65859948 | 17.22000578 | 9.377289134 | 9.322163736 | 6.371815362 | 8.918317705 |

|          |          |          |          |          |          |          |          |          |          |          |          |          |          |          |          |          |          |
|----------|----------|----------|----------|----------|----------|----------|----------|----------|----------|----------|----------|----------|----------|----------|----------|----------|----------|
| Liver 37 | Liver 38 | Liver 39 | Liver 40 | Liver 41 | Liver 42 | Liver 43 | Liver 44 | Liver 45 | Liver 46 | Liver 47 | Liver 48 | Liver 49 | Liver 50 | Liver 51 | Liver 52 | Liver 53 | Liver 54 |
| Control  | Control  | Control  | Control  | Control  | Control  | Control  | Control  | Control  | Nitrate  | Nitrate  | Nitrate  | Nitrate  | Nitrate  | Nitrate  | Nitrate  | Nitrate  | Nitrate  |
| 468000   | 781000   | 850000   | 801000   | 609000   | 1070000  | 880000   | 518000   | 638000   | 428000   | 710000   | 618000   | 610000   | 736000   | 862000   | 1050000  | 724000   | 688000   |
| 8544.9   | 125000   | 61019    | 61654    | 59834    | 30350    | 28611    | 42438    | 47539    | 55446    | 123000   | 41927    | 161000   | 48256    | 141000   | 49516    | 19092    | 37022    |
| 55604    | 171000   | 77954    | 68578    | 119000   | 34249    | 30644    | 45496    | 39962    | 79755    | 192000   | 73119    | 183000   | 34497    | 189000   | 99911    | 30998    | 59719    |
| 445000   | 125000   | 82953    | 693000   | 136000   | 432000   | 92620    | 188000   | 337000   | 540000   | 298000   | 235000   | 499000   | 392000   | 571000   | 236000   | 321000   | 329000   |
| 4162.1   | 10036    | 4904.2   | 5327.8   | 7978.5   | 6058.8   | 9265.4   | 11536    | 5135.2   | 3435     | 17115    | 5382     | 4616.5   | 4569.6   | 12864    | 9708.6   | 4145.4   | 6838.4   |
| 42897    | 34206    | 35997    | 56106    | 37350    | 55631    | 75278    | 75674    | 37113    | 52875    | 51270    | 35039    | 30023    | 61782    | 39241    | 55044    | 114000   | 47012    |
| 32630    | 104000   | 25349    | 124000   | 73421    | 69451    | 51132    | 8096.4   | 71618    | 19136    | 38870    | 24489    | 39692    | 79183    | 48546    | 110000   | 74129    | 37005    |
| 445000   | 125000   | 82953    | 693000   | 136000   | 432000   | 92620    | 188000   | 337000   | 540000   | 298000   | 235000   | 499000   | 392000   | 571000   | 236000   | 321000   | 329000   |
| 483000   | 1030000  | 344000   | 531000   | 254000   | 210000   | 221000   | 81150    | 228000   | 1020000  | 558000   | 428000   | 528000   | 296000   | 393000   | 277000   | 159000   | 91629    |
| 483000   | 1030000  | 344000   | 531000   | 254000   | 210000   | 221000   | 81150    | 228000   | 1020000  | 558000   | 428000   | 528000   | 296000   | 393000   | 277000   | 159000   | 91629    |
| 28200000 | 33700000 | 5590000  | 36500000 | 34200000 | 17300000 | 19300000 | 20000000 | 29300000 | 25100000 | 26800000 | 77800000 | 17400000 | 35300000 | 39000000 | 40300000 | 22700000 | 36900000 |
| 17147    | 38934    | 12822    | 61277    | 39210    | 50972    | 30220    | 30223    | 30645    | 22366    | 40230    | 21342    | 38887    | 44268    | 70948    | 16513    | 26051    | 31528    |
| 57952    | 224000   | 79473    | 290000   | 78337    | 75303    | 78025    | 44551    | 248000   | 162000   | 129000   | 54505    | 57206    | 434000   | 29544    | 92287    | 121000   | 98698    |
| 789000   | 549000   | 714000   | 487000   | 628000   | 675000   | 393000   | 539000   | 635000   | 984000   | 878000   | 761000   | 950000   | 177000   | 624000   | 284000   | 284000   | 319000   |
| 12027    | 21362    | 19592    | 48036    | 24870    | 28103    | 40328    | 22226    | 33296    | 12376    | 13743    | 9020.6   | 20765    | 81186    | 26219    | 17846    | 35259    | 24546    |
| 302000   | 475000   | 38417    | 865000   | 319000   | 208000   | 354000   | 139000   | 343000   | 238000   | 105000   | 85038    | 467000   | 203000   | 688000   | 85568    | 409000   | 269000   |
| 382000   | 411000   | 161000   | 222000   | 200000   | 69762    | 145000   | 105000   | 97559    | 551000   | 446000   | 382000   | 240000   | 219000   | 72465    | 85378    | 155000   | 183000   |
| 63604    | 32280    | 23300    | 36966    | 35355    | 44431    | 33953    | 28591    | 30209    | 51206    | 24270    | 20528    | 121000   | 63840    | 16162    | 12342    | 13766    | 21519    |
| 2330000  | 8080000  | 1190000  | 4620000  | 6600000  | 1930000  | 2030000  | 1780000  | 2910000  | 5950000  | 3170000  | 1400000  | 2950000  | 5890000  | 1970000  | 3540000  | 4540000  | 4320000  |
| 382000   | 402000   | 51162    | 140000   | 130000   | 51823    | 74157    | 40871    | 63847    | 308000   | 152000   | 382000   | 203000   | 219000   | 37019    | 20236    | 137000   | 87096    |
| 377000   | 511000   | 197000   | 647000   | 396000   | 502000   | 284000   | 131000   | 392000   | 397000   | 419000   | 315000   | 563000   | 384000   | 597000   | 487000   | 367000   | 277000   |
| 244000   | 1020000  | 320000   | 469000   | 821000   | 282000   | 403000   | 392000   | 684000   | 339000   | 659000   | 373000   | 445000   | 1350000  | 577000   | 706000   | 232000   | 393000   |
| 181000   | 421000   | 241000   | 216000   | 366000   | 138000   | 134000   | 158000   | 235000   | 288000   | 549000   | 176000   | 228000   | 198000   | 260000   | 470000   | 235000   | 126000   |
| 98830    | 135000   | 41498    | 126000   | 132000   | 64000    | 67139    | 36627    | 74304    | 80025    | 59844    | 52850    | 111000   | 73880    | 95830    | 63656    | 75850    | 125000   |
| 527000   | 2330000  | 607000   | 1420000  | 2960000  | 885000   | 889000   | 849000   | 1910000  | 978000   | 1200000  | 648000   | 2240000  | 1900000  | 1450000  | 1860000  | 1130000  | 671000   |
| 4433.9   | 1598.6   | 11688    | 5807.5   | 53550    | 4121.7   | 4920.1   | 23450    | 2328.5   | 3231.8   | 119000   | 13705    | 0        | 231000   | 0        | 6214.6   | 11865    | 185000   |
| 90222    | 102000   | 18271    | 128000   | 58217    | 87749    | 28925    | 41261    | 81671    | 124000   | 77695    | 44491    | 288000   | 17944    | 163000   | 38431    | 54017    | 69295    |
| 206000   | 231000   | 55428    | 204000   | 209000   | 189000   | 90915    | 88221    | 146000   | 263000   | 204000   | 165000   | 496000   | 142000   | 334000   | 111000   | 90823    | 108000   |
| 29946    | 66270    | 47914    | 66286    | 63045    | 39019    | 56373    | 14188    | 35236    | 36109    | 20100    | 35365    | 49936    | 47040    | 145000   | 47494    | 34850    | 32393    |
| 377000   | 511000   | 197000   | 647000   | 396000   | 502000   | 284000   | 131000   | 392000   | 397000   | 419000   | 315000   | 563000   | 384000   | 597000   | 487000   | 367000   | 277000   |
| 30677    | 30972    | 16343    | 13908    | 7141.5   | 10930    | 5602.2   | 7345     | 9981.3   | 37268    | 40830    | 46035    | 25705    | 10781    | 15981    | 4633.2   | 4215.8   | 11187    |
| 28200000 | 33700000 | 5590000  | 36500000 | 34200000 | 17300000 | 19300000 | 20000000 | 29300000 | 25600000 | 26800000 | 16100000 | 17400000 | 47100000 | 39000000 | 40300000 | 22700000 | 36900000 |
| 5853.3   | 13256    | 3877.5   | 56883    | 18015    | 5755.9   | 3272.8   | 3872.9   | 15773    | 6983.2   | 16590    | 15059    | 29451    | 9949.8   | 35501    | 1558.9   | 5406.5   | 5784     |
| 1120000  | 2150000  | 317000   | 2090000  | 2360000  | 1250000  | 1400000  | 1010000  | 1330000  | 1330000  | 541000   | 753000   | 840000   | 2080000  | 1100000  | 1450000  | 503000   | 721000   |
| 483000   | 1030000  | 344000   | 531000   | 254000   | 210000   | 221000   | 81150    | 228000   | 1020000  | 558000   | 428000   | 528000   | 296000   | 393000   | 277000   | 159000   | 91629    |
| 239000   | 52571    | 48397    | 94738    | 18765    | 45019    | 38361    | 59905    | 72226    | 53043    | 107000   | 65645    | 27508    | 279000   | 40921    | 25846    | 20822    | 182000   |
| 273000   | 742000   | 195000   | 649000   | 718000   | 294000   | 377000   | 373000   | 431000   | 435000   | 612000   | 397000   | 372000   | 878000   | 371000   | 664000   | 499000   | 381000   |
| 68680    | 220000   | 39419    | 59746    | 89762    | 29365    | 33583    | 34829    | 55126    | 86779    | 129000   | 75380    | 72916    | 60992    | 50851    | 48043    | 64002    | 51633    |
| 10600000 | 33700000 | 5720000  | 22100000 | 27100000 | 11500000 | 12100000 | 9450000  | 18200000 | 17900000 | 14000000 | 9270000  | 20700000 | 27200000 | 17000000 | 14900000 | 9480000  | 12900000 |
| 172000   | 436000   | 86497    | 174000   | 285000   | 68537    | 114000   | 174000   | 230000   | 377000   | 308000   | 165000   | 75803    | 243000   | 111000   | 291000   | 56206    | 141000   |
| 430000   | 2710000  | 1520000  | 282000   | 597000   | 219000   | 776000   | 239000   | 381000   | 305000   | 4570000  | 1610000  | 320000   | 2200000  | 431000   | 536000   | 887000   | 63503    |
| 33293    | 45217    | 34844    | 48228    | 78090    | 77220    | 81358    | 48868    | 46271    | 23296    | 42780    | 31753    | 78905    | 52374    | 73658    | 60799    | 38598    | 53056    |
| 427000   | 837000   | 163000   | 495000   | 626000   | 320000   | 358000   | 193000   | 410000   | 673000   | 520000   | 325000   | 346000   | 691000   | 348000   | 557000   | 724000   | 603000   |
| 25040    | 25843    | 10755    | 13251    | 8344.5   | 7081.8   | 14896    | 7689.8   | 8971.9   | 23458    | 20715    | 29060    | 5453.4   | 8190     | 6883.4   | 6219.8   | 11214    | 9807.2   |
| 42693    | 136000   | 126000   | 92457    | 82575    | 55808    | 36612    | 35413    | 89348    | 96721    | 153000   | 46948    | 152000   | 73511    | 149000   | 94504    | 74221    | 35523    |
| 596000   | 544000   | 716000   | 380000   | 624000   | 434000   | 263000   | 532000   | 369000   | 983000   | 870000   | 761000   | 943000   | 172000   | 614000   | 396000   | 284000   | 330000   |
| 6633     | 3185.8   | 11021    | 20806    | 6501     | 11920    | 13139    | 2013.5   | 8153.6   | 6977.6   | 6966     | 4265.4   | 6173.5   | 9987.6   | 14959    | 15088    | 19289    | 8895.5   |
| 42693    | 136000   | 126000   | 92457    | 82575    | 55808    | 36612    | 35413    | 89348    | 96721    | 153000   | 46948    | 152000   | 73511    | 149000   | 94504    | 74221    | 35523    |
| 8951.8   | 50210    | 16451    | 23080    | 39256    | 12729    | 13061    | 7964.8   | 18628    | 13717    | 61349    | 7615.4   | 47297    | 33181    | 48957    | 27279    | 13694    | 7985.5   |
| 98439    | 173000   | 38697    | 143000   | 171000   | 109000   | 116000   | 91428    | 89807    | 104000   | 115000   | 59508    | 78662    | 169000   | 104000   | 134000   | 68038    | 115000   |
| 53585    | 60276    | 69279    | 58822    | 64665    | 69300    | 70243    | 66932    | 70609    | 67648    | 106000   | 77478    | 102000   | 41912    | 62032    | 68495    | 75317    | 70638    |
| 459000   | 1590000  | 366000   | 825000   | 1360000  | 322000   | 966000   | 855000   | 932000   | 480000   | 1330000  | 589000   | 440000   | 901000   | 467000   | 1380000  | 369000   | 632000   |
| 18850    | 48897    | 11484    | 45775    | 49872    | 31854    | 15325    | 18378    | 31976    | 26773    | 31256    | 15534    | 59732    | 37565    | 26833    | 36999    | 89820    | 18800    |
| 338000   | 122000   | 143000   | 272000   | 383000   | 246000   | 291000   | 85639    | 277000   | 227000   | 28665    | 66667    | 334000   | 298000   | 340000   | 167000   | 501000   | 242000   |
| 31347    | 3524.7   | 7216.8   | 9654.6   | 8806.5   | 16295    | 3111.3   | 1398.4   | 10084    | 13804    | 1635     | 4368.2   | 11963    | 6127.8   | 10078    | 4130.3   | 10857    | 5214.6   |
| 31316    | 97617    | 17959    | 50206    | 73094    | 18117    | 43507    | 44968    | 37506    | 27631    | 95660    | 33186    | 47741    | 35008    | 94946    | 54937    | 22935    | 26989    |
| 71114    | 222000   | 143000   | 106000   | 131000   | 50459    | 44660    | 70167    | 75731    | 122000   | 285000   | 97563    | 235000   | 59155    | 279000   | 138000   | 48662    | 82148    |
| 68248    | 5425     | 0        | 8079     | 38295    | 4751.3   | 75326    | 34486    | 10672    | 3069.9   | 5139     | 2226.7   | 2731.8   | 3082     | 5728.9   | 7398.6   | 4435.2   | 37637    |
| 138000   | 79042    | 53481    | 39319    | 20640    | 21529    | 25821    | 10282    | 12544    | 126000   | 29580    | 90280    | 44501    | 39619    | 56585    | 17873    | 22953    | 29725    |
| 63308    | 55702    | 35018    | 67721    | 66930    | 86394    | 66168    | 83752    | 79870    | 69888    | 49650    | 52244    | 43205    | 80094    | 39512    | 56747    | 96069    | 100000   |
| 11675    | 50532    | 8970.2   | 43703    | 51630    | 29020    | 7159.2   | 95849    | 50421    | 14941    | 41010    | 8384.2   | 16332    | 74046    | 18981    | 43705    | 50390    | 37904    |
| 173000   | 130000   |          |          |          |          |          |          |          |          |          |          |          |          |          |          |          |          |

|          |          |         |          |          |          |          |          |          |          |          |          |          |          |          |          |          |          |
|----------|----------|---------|----------|----------|----------|----------|----------|----------|----------|----------|----------|----------|----------|----------|----------|----------|----------|
| 274000   | 473000   | 989000  | 798000   | 431000   | 731000   | 668000   | 678000   | 589000   | 435000   | 584000   | 470000   | 694000   | 576000   | 989000   | 946000   | 773000   | 491000   |
| 50108    | 38162    | 40870   | 44521    | 38055    | 62317    | 55727    | 36812    | 43257    | 42885    | 52980    | 75702    | 41021    | 48594    | 65338    | 75412    | 41507    | 53921    |
| 3730000  | 2080000  | 705000  | 6070000  | 2100000  | 2850000  | 1020000  | 1020000  | 2160000  | 3340000  | 1790000  | 1570000  | 5130000  | 1730000  | 5080000  | 1490000  | 3190000  | 3530000  |
| 42677    | 18386    | 35662   | 138000   | 51255    | 87252    | 56981    | 92351    | 37676    | 59808    | 55395    | 42646    | 91935    | 31307    | 109000   | 36736    | 58191    | 87796    |
| 68255    | 4628.8   | 0       | 7870.9   | 37905    | 4878.7   | 75345    | 10271    | 10408    | 2134.7   | 2707.5   | 2202.2   | 2026.9   | 2822.4   | 5498.6   | 6660.7   | 3142.7   | 38741    |
| 5850000  | 6260000  | 777000  | 1230000  | 13000000 | 3850000  | 420000   | 5110000  | 6740000  | 1820000  | 3160000  | 2020000  | 4090000  | 13100000 | 3330000  | 10600000 | 11800000 | 11200000 |
| 361000   | 357000   | 423000  | 492000   | 356000   | 768000   | 326000   | 295000   | 444000   | 382000   | 389000   | 414000   | 574000   | 254000   | 472000   | 422000   | 471000   | 246000   |
| 20181    | 64177    | 21977   | 38682    | 56557    | 30507    | 32287    | 17479    | 28042    | 23071    | 40671    | 28868    | 45243    | 15416    | 51924    | 47651    | 23495    | 18852    |
| 335000   | 238000   | 15330   | 266000   | 140000   | 138000   | 78502    | 157000   | 215000   | 68293    | 178000   | 42265    | 234000   | 104000   | 180000   | 50476    | 88316    | 188000   |
| 114000   | 51758    | 14446   | 68640    | 65025    | 74382    | 62672    | 148000   | 79723    | 41860    | 55815    | 51696    | 73939    | 41483    | 78319    | 19853    | 49781    | 97612    |
| 266000   | 648000   | 120000  | 237000   | 502000   | 140000   | 125000   | 102000   | 248000   | 477000   | 310000   | 237000   | 287000   | 232000   | 159000   | 173000   | 203000   | 211000   |
| 181000   | 421000   | 241000  | 216000   | 366000   | 138000   | 202000   | 158000   | 235000   | 288000   | 549000   | 176000   | 228000   | 442000   | 260000   | 470000   | 235000   | 126000   |
| 2750000  | 3070000  | 1340000 | 5020000  | 3750000  | 2030000  | 1510000  | 637000   | 2690000  | 3800000  | 1920000  | 1810000  | 2930000  | 4630000  | 2050000  | 4750000  | 1730000  | 1280000  |
| 1080000  | 2190000  | 685000  | 2050000  | 1770000  | 1110000  | 675000   | 804000   | 870000   | 1040000  | 1870000  | 1250000  | 2450000  | 1680000  | 4300000  | 1600000  | 757000   | 959000   |
| 244000   | 1020000  | 320000  | 469000   | 821000   | 282000   | 403000   | 392000   | 684000   | 339000   | 659000   | 373000   | 445000   | 1350000  | 577000   | 706000   | 232000   | 393000   |
| 42897    | 34206    | 35997   | 56106    | 37350    | 55631    | 75278    | 75674    | 37113    | 52875    | 51270    | 35039    | 30023    | 61782    | 39241    | 30083    | 114000   | 47012    |
| 13686    | 79356    | 25338   | 19095    | 117000   | 18393    | 60824    | 22549    | 57991    | 19075    | 59252    | 25254    | 19235    | 88946    | 21208    | 40283    | 55546    | 34083    |
| 3190000  | 2830000  | 799000  | 4530000  | 2110000  | 773000   | 1770000  | 1410000  | 2830000  | 2190000  | 1770000  | 1120000  | 2950000  | 2050000  | 2770000  | 2790000  | 1430000  | 1440000  |
| 750000   | 406000   | 354000  | 865000   | 500000   | 492000   | 991000   | 1100000  | 710000   | 433000   | 220000   | 293000   | 811000   | 551000   | 817000   | 631000   | 665000   | 606000   |
| 1390000  | 2210000  | 560000  | 679000   | 1850000  | 793000   | 544000   | 724000   | 1470000  | 1450000  | 1090000  | 1330000  | 1370000  | 1420000  | 1120000  | 1090000  | 513000   | 859000   |
| 1380000  | 1240000  | 1190000 | 662000   | 1490000  | 1070000  | 1070000  | 1480000  | 1560000  | 955000   | 998000   | 1600000  | 772000   | 1420000  | 914000   | 1150000  | 751000   | 1220000  |
| 1780000  | 3490000  | 705000  | 3470000  | 3600000  | 1830000  | 1780000  | 1480000  | 2660000  | 2290000  | 2170000  | 1310000  | 2930000  | 3510000  | 1830000  | 3060000  | 6200000  | 1780000  |
| 18076    | 18710    | 6759    | 34481    | 14129    | 34501    | 23414    | 3183.5   | 22901    | 15164    | 15293    | 4507     | 38110    | 33844    | 15315    | 39580    | 8530.8   | 12145    |
| 238000   | 317000   | 107000  | 424000   | 297000   | 203000   | 128000   | 133000   | 236000   | 248000   | 304000   | 147000   | 368000   | 388000   | 383000   | 229000   | 230000   | 275000   |
| 516000   | 443000   | 43146   | 284000   | 567000   | 474000   | 105000   | 58935    | 306000   | 311000   | 102000   | 76475    | 831000   | 196000   | 268000   | 55058    | 379000   | 106000   |
| 11454    | 18880    | 13863   | 41057    | 18765    | 16579    | 15419    | 19115    | 10074    | 6731.2   | 10670    | 8443.4   | 19190    | 16678    | 41924    | 7908.1   | 9954     | 3136.3   |
| 28420    | 19892    | 4827.4  | 39666    | 29360    | 21252    | 10019    | 16831    | 17460    | 26319    | 3547.4   | 6036.3   | 25697    | 21562    | 18506    | 7221.3   | 11455    | 17231    |
| 1780000  | 3490000  | 705000  | 3470000  | 3600000  | 1830000  | 1780000  | 1480000  | 2660000  | 2290000  | 2170000  | 1310000  | 2930000  | 3510000  | 1830000  | 3060000  | 6200000  | 1780000  |
| 316000   | 1090000  | 337000  | 920000   | 1130000  | 534000   | 385000   | 445000   | 961000   | 517000   | 648000   | 349000   | 1250000  | 1240000  | 750000   | 1030000  | 361000   | 475000   |
| 403000   | 345000   | 231000  | 446000   | 421000   | 582000   | 479000   | 507000   | 526000   | 466000   | 320000   | 348000   | 292000   | 507000   | 237000   | 400000   | 487000   | 597000   |
| 64736    | 55878    | 35799   | 67104    | 67755    | 87054    | 66472    | 83263    | 80213    | 71456    | 49575    | 51127    | 40081    | 80598    | 46585    | 48761    | 69668    | 99544    |
| 414.07   | 1416.3   | 1352.8  | 6371.1   | 10772.8  | 496.98   | 2682.8   | 0        | 613.97   | 2979.8   | 0        | 0        | 2576.8   | 1695.1   | 11314    | 349.67   | 1637     | 519.34   |
| 63114    | 60193    | 54610   | 111000   | 76215    | 148000   | 141000   | 111000   | 118000   | 101000   | 56670    | 61013    | 66421    | 178000   | 94091    | 104000   | 133000   | 152000   |
| 39620    | 14956    | 25370   | 34481    | 27960    | 44979    | 27731    | 18472    | 37696    | 22719    | 16320    | 15229    | 48654    | 28510    | 58373    | 18084    | 37118    | 30323    |
| 42125    | 20023    | 8423.3  | 14322    | 7129.5   | 27845    | 43159    | 11138    | 26548    | 37520    | 7863     | 15488    | 17666    | 35171    | 18675    | 22876    | 24360    | 38088    |
| 92322    | 80000    | 86688   | 354000   | 96450    | 136000   | 54226    | 147000   | 118000   | 151000   | 127000   | 85026    | 241000   | 86772    | 299000   | 90341    | 261000   | 221000   |
| 98830    | 135000   | 41498   | 126000   | 132000   | 64000    | 67139    | 36627    | 74304    | 80025    | 59844    | 52850    | 111000   | 73880    | 95830    | 63656    | 511000   | 125000   |
| 218000   | 303000   | 97464   | 367000   | 204000   | 171000   | 104000   | 74755    | 177000   | 324000   | 261000   | 149000   | 353000   | 175000   | 250000   | 168000   | 121000   | 96629    |
| 686000   | 407000   | 411000  | 618000   | 338000   | 758000   | 296000   | 598000   | 407000   | 768000   | 419000   | 596000   | 382000   | 425000   | 485000   | 343000   | 278000   | 433000   |
| 681000   | 1190000  | 634000  | 1130000  | 1010000  | 829000   | 418000   | 203000   | 673000   | 2460000  | 276000   | 178000   | 1180000  | 556000   | 800000   | 346000   | 487000   | 973000   |
| 891000   | 1080000  | 298000  | 1390000  | 1020000  | 1040000  | 685000   | 314000   | 856000   | 769000   | 444000   | 422000   | 1920000  | 2350000  | 723000   | 1330000  | 582000   | 709000   |
| 28200000 | 33700000 | 5590000 | 36500000 | 34200000 | 17300000 | 19300000 | 20000000 | 29300000 | 25600000 | 26800000 | 16100000 | 17400000 | 47100000 | 39000000 | 40300000 | 22700000 | 36900000 |
| 91908    | 77085    | 83576   | 352000   | 95550    | 243000   | 54169    | 147000   | 118000   | 148000   | 126000   | 123000   | 241000   | 83370    | 297000   | 41554    | 261000   | 289000   |
| 15681    | 5985.8   | 2961.5  | 27511    | 11766    | 10138    | 3784.6   | 5196.5   | 7361.5   | 11279    | 9203.5   | 5941.9   | 18744    | 5741.3   | 16780    | 4770.5   | 11764    | 15697    |
| 20321    | 3224.9   | 0       | 20210    | 1602     | 23522    | 2695.2   | 9011.7   | 7707.7   | 14386    | 0        | 4087     | 10685    | 2959.7   | 4184.2   | 0        | 4650.5   | 2105     |
| 8951.8   | 50210    | 16451   | 23080    | 39256    | 12729    | 13061    | 7964.8   | 18628    | 13717    | 61349    | 7615.4   | 47297    | 33181    | 48957    | 27279    | 13694    | 7985.5   |
| 563000   | 243000   | 816000  | 558000   | 557000   | 343000   | 524000   | 338000   | 671000   | 460000   | 237000   | 315000   | 551000   | 419000   | 1320000  | 665000   | 958000   | 608000   |
| 77280    | 19405    | 27466   | 50692    | 61905    | 60588    | 50854    | 13872    | 51009    | 39855    | 7185     | 8939.2   | 60211    | 42042    | 72032    | 27350    | 93996    | 38971    |
| 338000   | 122000   | 143000  | 272000   | 383000   | 246000   | 291000   | 85639    | 277000   | 227000   | 28665    | 66667    | 334000   | 298000   | 340000   | 167000   | 501000   | 242000   |
| 980000   | 2890000  | 451000  | 1670000  | 2780000  | 916000   | 1310000  | 907000   | 1780000  | 1400000  | 1720000  | 810000   | 1830000  | 2040000  | 1060000  | 1400000  | 1320000  | 1050000  |
| 4260000  | 34600000 | 6980000 | 5550000  | 21700000 | 2390000  | 14600000 | 17700000 | 9810000  | 3430000  | 14500000 | 10600000 | 1750000  | 12900000 | 2510000  | 15900000 | 3330000  | 8900000  |
| 172000   | 436000   | 86497   | 174000   | 285000   | 68537    | 114000   | 174000   | 230000   | 377000   | 308000   | 165000   | 75803    | 243000   | 111000   | 291000   | 56206    | 141000   |
| 2540000  | 4170000  | 1430000 | 5440000  | 4070000  | 2520000  | 2250000  | 1410000  | 3620000  | 6710000  | 5310000  | 2870000  | 5250000  | 5800000  | 4000000  | 3780000  | 1720000  | 1300000  |
| 13999    | 17344    | 10368   | 32573    | 52669    | 15754    | 19765    | 12169    | 7310.6   | 6776.6   | 9429.2   | 1824     | 18694    | 31315    | 21379    | 40419    | 13243    | 24101    |
| 41934    | 53645    | 4317.9  | 27788    | 45307    | 38321    | 11185    | 5941.7   | 23250    | 25805    | 7997.5   | 4010.2   | 79300    | 15748    | 25422    | 5057     | 25074    | 9490.5   |
| 396000   | 500000   | 96355   | 475000   | 574000   | 462000   | 212000   | 104000   | 320000   | 375000   | 186000   | 124000   | 869000   | 283000   | 410000   | 139000   | 322000   | 197000   |
| 26934    | 23362    | 5944.6  | 28834    | 30015    | 36131    | 15066    | 7166.9   | 14825    | 29102    | 10745    | 13094    | 25430    | 26656    | 33774    | 20993    | 17062    | 19007    |
| 5640.1   | 13709    | 15698   | 15504    | 17730    | 13992    | 18136    | 19757    | 13622    | 7666.4   | 17865    | 10456    | 10418    | 14091    | 19444    | 20711    | 14910    | 16026    |
| 28055    | 23824    | 19741   | 34279    | 22185    | 29436    | 38076    | 32191    | 32708    | 25766    | 18645    | 22074    | 20218    | 54306    | 25531    | 26558    | 45434    | 25300    |
| 11675    | 50532    | 8970.2  | 43703    | 51630    | 29020    | 7159.2   | 95849    | 50421    | 14941    | 41010    | 8384.2   | 16332    | 74046    | 18981    | 43705    | 50390    | 37904    |
| 377000   | 511000   | 197000  | 647000   | 396000   | 502000   | 284000   | 131000   | 392000   | 397000   | 419000   | 315000   | 563000   | 384000   | 597000   | 487000   | 367000   | 277000   |
| 64635    | 285000   | 80227   | 115000   | 191000   | 94759    | 100000   | 46182    | 132000   | 83518    | 186000   | 96406    | 137000   | 138000   | 170000   | 14600    |          |          |



|             |             |             |             |             |             |             |             |             |             |             |             |             |             |             |             |             |             |
|-------------|-------------|-------------|-------------|-------------|-------------|-------------|-------------|-------------|-------------|-------------|-------------|-------------|-------------|-------------|-------------|-------------|-------------|
| 35565       | 266000      | 115000      | 139000      | 202000      | 75728       | 74478       | 78861       | 109000      | 113000      | 263000      | 84923       | 310000      | 98008       | 281000      | 149000      | 55229       | 99646       |
| 266000      | 177000      | 35821       | 254000      | 185000      | 201000      | 18667       | 82790       | 121000      | 421000      | 281000      | 178000      | 392000      | 127000      | 346000      | 96166       | 153000      | 157000      |
| 50805       | 22372       | 78393       | 133000      | 30315       | 82830       | 17138       | 33997       | 78498       | 44262       | 30750       | 28483       | 24841       | 32038       | 197000      | 35191       | 95246       | 58015       |
| 12689       | 15193       | 10945       | 24856       | 21060       | 14685       | 13699       | 4506.4      | 12520       | 12942       | 5913        | 14060       | 13945       | 22193       | 55745       | 11120       | 9765        | 12733       |
| 63114       | 60193       | 54610       | 111000      | 76215       | 148000      | 141000      | 111000      | 118000      | 101000      | 56670       | 61013       | 66421       | 178000      | 94091       | 104000      | 133000      | 152000      |
| 79902       | 101000      | 212000      | 256000      | 101000      | 248000      | 56544       | 91055       | 194000      | 84616       | 154000      | 62900       | 865000      | 77742       | 377000      | 153000      | 154000      | 97888       |
| 3140000     | 10900000    | 3690000     | 6040000     | 9180000     | 3000000     | 3680000     | 4010000     | 4370000     | 4790000     | 6840000     | 3780000     | 6410000     | 5370000     | 7140000     | 6020000     | 2370000     | 2910000     |
| 241000      | 298000      | 120000      | 430000      | 319000      | 180000      | 131000      | 52132       | 270000      | 354000      | 173000      | 160000      | 254000      | 429000      | 201000      | 379000      | 155000      | 127000      |
| 244000      | 1020000     | 320000      | 469000      | 821000      | 282000      | 403000      | 392000      | 684000      | 339000      | 659000      | 373000      | 445000      | 1350000     | 577000      | 706000      | 232000      | 393000      |
| 1150000     | 842000      | 36499       | 655000      | 622000      | 992000      | 122000      | 338000      | 122000      | 948000      | 770000      | 198000      | 542000      | 433000      | 191000      | 577000      | 578000      | 456000      |
| 483000      | 1030000     | 344000      | 531000      | 254000      | 210000      | 221000      | 81150       | 228000      | 1020000     | 558000      | 428000      | 528000      | 296000      | 393000      | 277000      | 159000      | 91629       |
| 3660000     | 5930000     | 1250000     | 6330000     | 5890000     | 5080000     | 4910000     | 1440000     | 5160000     | 3580000     | 2470000     | 3850000     | 3990000     | 6650000     | 6950000     | 6680000     | 1900000     | 2400000     |
| 237000      | 390000      | 57054       | 430000      | 502000      | 223000      | 215000      | 194000      | 334000      | 297000      | 261000      | 182000      | 334000      | 438000      | 259000      | 252000      | 222000      | 295000      |
| 68048       | 70524       | 48893       | 91759       | 116000      | 113000      | 65123       | 107000      | 83937       | 83720       | 61620       | 43808       | 140000      | 63672       | 72222       | 61156       | 52511       | 54860       |
| 291000      | 351000      | 90893       | 373000      | 374000      | 190000      | 189000      | 245000      | 350000      | 295000      | 295000      | 164000      | 211000      | 293000      | 288000      | 228000      | 52363       | 104000      |
| 28297       | 42086       | 17124       | 47743       | 32250       | 40722       | 63090       | 76153       | 35251       | 17517       | 24300       | 19906       | 44628       | 36078       | 44525       | 26915       | 40593       | 38815       |
| 35917       | 128000      | 28506       | 40943       | 59506       | 17447       | 10115       | 19611       | 32914       | 46129       | 54601       | 78371       | 50600       | 53284       | 23875       | 25103       | 25818       | 34255       |
| 149000      | 547000      | 228000      | 45874       | 174000      | 40082       | 381000      | 250000      | 70560       | 142000      | 390000      | 247000      | 50178       | 86352       | 12948       | 106000      | 135000      | 163000      |
| 149000      | 547000      | 228000      | 45874       | 174000      | 40082       | 381000      | 250000      | 70560       | 142000      | 390000      | 247000      | 50178       | 86352       | 12948       | 106000      | 135000      | 163000      |
| 159000      | 582000      | 300000      | 42986       | 264000      | 40214       | 113000      | 80152       | 95011       | 188000      | 563000      | 381000      | 42469       | 101000      | 21119       | 88532       | 137000      | 144000      |
| 202000      | 270000      | 249000      | 146000      | 297000      | 222000      | 314000      | 178000      | 253000      | 235000      | 200000      | 264000      | 120000      | 354000      | 186000      | 387000      | 371000      | 307000      |
| 28200000    | 33700000    | 5590000     | 36500000    | 34200000    | 17300000    | 19300000    | 20000000    | 29300000    | 25100000    | 26800000    | 7780000     | 17400000    | 35300000    | 39000000    | 40300000    | 22700000    | 36900000    |
| 470000      | 408000      | 129000      | 499000      | 268000      | 317000      | 182000      | 88138       | 420000      | 347000      | 232000      | 191000      | 274000      | 236000      | 383000      | 447000      | 158000      | 173000      |
| 142.0829346 | 313.9259693 | 193.7304397 | 183.863479  | 279.5888142 | 162.8872838 | 563.8959355 | 360.4696932 | 452.6608293 | 343.5157753 | 240.8970091 | 209.4408408 | 213.4528434 | 390.2127914 | 810.4741913 | 345.8105423 | 208.5174965 | 420.5825913 |
| 874.1419726 | 1729.935865 | 1020.491018 | 933.0043366 | 899.0642736 | 752.8080134 | 861.9807282 | 1283.637477 | 1279.416306 | 979.8337981 | 979.1175005 | 813.262326  | 1012.694464 | 916.9120566 | 942.4919964 | 817.1030589 | 988.6028069 | 1002.531171 |
| 448.9426965 | 434.2741121 | 688.0277203 | 688.8022426 | 548.3057568 | 408.5029112 | 3327.930211 | 600.4384724 | 920.9979091 | 554.22562   | 1072.932269 | 401.7015423 | 899.1126521 | 1883.660196 | 3758.243976 | 2916.979726 | 630.7144619 | 1313.787034 |
| 317.3099323 | 1.852355957 | 9.430511594 | 79.41934417 | 69.62962507 | 128.8162651 | 85.105636   | 57.27238151 | 86.58300302 | 20.74002063 | 11.74155348 | 26.02669703 | 11.28788628 | 32.9723815  | 42.57317695 | 19.38283356 | 182.8934803 | 146.0530905 |
| 1747.618053 | 132.006382  | 286.0941248 | 312.8210895 | 1349.434856 | 441.175113  | 1849.733838 | 363.5937985 | 299.9446885 | 327.0828947 | 61.95239297 | 126.7480013 | 80.22723594 | 1835.843171 | 48.36461314 | 302.6825883 | 696.2637611 | 242.6078571 |
| 165.1850309 | 171.9288626 | 101.2102622 | 328.1340489 | 250.1633426 | 360.4963045 | 273.4639639 | 215.8533875 | 343.2354225 | 320.4484347 | 69.56467877 | 153.0996362 | 283.6823434 | 183.9789603 | 96.86537701 | 103.4439158 | 128.5278913 | 46.8173384  |
| 1058.280155 | 236.9545139 | 329.2529095 | 790.2353884 | 341.3470069 | 638.7837691 | 176.2344591 | 344.0641084 | 858.1065855 | 529.9271903 | 192.2288949 | 575.1154266 | 1263.456718 | 1078.64705  | 532.366478  | 371.1182514 | 584.7998629 | 607.2257006 |
| 608.8051762 | 845.0674001 | 881.6554316 | 881.3443269 | 925.0590975 | 696.0939695 | 807.3844564 | 899.2017537 | 1127.125058 | 562.0300949 | 717.937842  | 619.3112365 | 720.0268653 | 1336.371154 | 603.7552479 | 1486.23564  | 530.6094724 | 749.5810821 |
| 179.6520063 | 498.2295283 | 43.00369112 | 1.16261545  | 293.1843408 | 32.96784283 | 51.98347426 | 15.95090829 | 415.4456131 | 1428.226243 | 38.79380517 | 10.61319487 | 249.9091221 | 160.736789  | 77.14950581 | 2.899055922 | 12.67702343 | 2.699998632 |
| 4697.83103  | 4160.980032 | 3325.78034  | 5778.637738 | 5285.278977 | 4895.364049 | 9146.668012 | 7396.655478 | 6273.383191 | 4610.496076 | 5394.244499 | 5099.313745 | 3256.317319 | 11235.70067 | 2987.396624 | 10796.63097 | 15098.5994  | 6678.051704 |
| 20.04935014 | 0           | 0           | 22.04622853 | 0           | 76.73891235 | 74.00874789 | 0           | 19.52060592 | 5.423247685 | 0           | 22.47229991 | 7.80231675  | 88.54662822 | 0           | 67.98955337 | 0           | 27.69899387 |
| 8.176151005 | 21.20240173 | 1.676888179 | 20.69827121 | 18.47337505 | 70.56324896 | 48.65179079 | 2.891003751 | 64.39285543 | 38.08922947 | 47.565751   | 35.92288941 | 8.227280933 | 53.88637269 | 12.39645386 | 77.89942773 | 48.08530289 | 22.56614287 |
| 72.43390557 | 95.19340883 | 93.72377228 | 10.02254019 | 490.7940024 | 132.6171989 | 23.11554889 | 26.31267355 | 7.327262276 | 98.77659457 | 21.87228178 | 6.032616714 | 305.5698675 | 120.4839196 | 7.848106442 | 24.31950802 | 19.9531555  | 17.08933613 |
| 227.1437552 | 620.7308826 | 519.1164057 | 97.60781655 | 1550.562854 | 477.1672342 | 36.20160995 | 35.62780388 | 136.5883903 | 148.3882575 | 39.76064449 | 75.87730996 | 828.0682486 | 377.9580928 | 411.8470747 | 54.89692534 | 216.7951052 | 58.77569136 |
| 1321.118852 | 1377.72781  | 4147.054677 | 1332.094222 | 1611.392499 | 1589.191066 | 1661.971562 | 1641.373859 | 1637.182208 | 1366.311385 | 1916.483818 | 1545.135143 | 976.9571205 | 1683.730618 | 1487.064377 | 4157.796473 | 1611.014174 | 1314.27751  |
| 205.603912  | 25.58978253 | 18.84856286 | 18.26019298 | 6.239464288 | 85.03544741 | 0           | 2.94706E-07 | 39.45443465 | 45.68603536 | 17.77409366 | 6.375910002 | 7.636288933 | 0           | 29.40594761 | 6.302428962 | 6.954860406 | 94.50892555 |
| 1719.040219 | 20.47843574 | 14.55635062 | 300.8841064 | 208.0289952 | 434.8244268 | 282.4833244 | 361.5439172 | 297.1607311 | 21.66802464 | 6.534080243 | 1.64622383  | 130.3419721 | 65.63976818 | 9.197011566 | 0.189087898 | 1028.365917 | 1048.735084 |
| 171.0236896 | 191.7480911 | 220.8766488 | 120.7746759 | 121.2019893 | 89.05697668 | 172.7908446 | 244.628652  | 228.7409459 | 192.1668045 | 91.22995802 | 162.0265817 | 25.57330203 | 81.89862464 | 75.21322726 | 380.2832403 | 134.7583382 | 66.04071715 |
| 43.83336307 | 127.0668306 | 54.24095728 | 87.114366   | 105.9137204 | 61.13712243 | 92.87424869 | 34.3750917  | 85.10194459 | 34.97808044 | 185.1055421 | 74.79909161 | 74.68177693 | 109.8295824 | 139.5481467 | 101.0279407 | 49.57801529 | 52.30139593 |
| 34.95128904 | 39.6373623  | 25.58130913 | 39.77584098 | 38.86643581 | 51.34846117 | 55.87948581 | 44.55234807 | 84.20776204 | 28.75715129 | 26.9327377  | 27.7815883  | 37.24923972 | 98.6269746  | 9.255152334 | 87.98118513 | 20.79785368 | 42.47053392 |
| 27.33905486 | 10.46581918 | 9.429319918 | 19.26462157 | 21.80039535 | 143.2239735 | 45.1972948  | 89.24414599 | 171.656575  | 118.1096156 | 38.5752764  | 71.70511188 | 46.03723639 | 237.5128018 | 31.76795108 | 17.42327773 | 38.76257172 | 42.85444517 |
| 9.042824719 | 20.74796069 | 8.934365952 | 10.48763966 | 14.46578984 | 54.79979068 | 18.223074   | 26.93234068 | 45.35492366 | 34.42035461 | 11.33094431 | 39.24027146 | 42.80866978 | 91.23148899 | 35.48884384 | 22.90739289 | 31.39334768 | 31.98293356 |
